# Supplementary material for: Ultrafast RAFT polymerization: multiblock copolymers within minutes
Source: Royal Society of Chemistry journal article supplement (doi:10.1039/c4py01251h), 2014-11-27
Supplement: c4py01251h1.pdf [file c4py01251h1.pdf]

Electronic Supplementary Information for

# Ultrafast RAFT Polymerization: Multiblock Copolymers within Minutes

*Guillaume Gody<sup>‡,1,\*</sup>, Raphael Barbey<sup>‡</sup>, Maarten Danial<sup>‡,2</sup> and Sébastien Perrier<sup>1,3,\*</sup>*

Key Centre for Polymers & Colloids, School of Chemistry, The University of Sydney, NSW  
2006, Sydney, Australia.

<sup>‡</sup>These authors contributed equally.

**Present addresses:**

<sup>1</sup> Department of Chemistry, The University of Warwick, CV4 7AL, UK.

<sup>2</sup> CSIRO Manufacturing Flagship, Bayview Ave., Clayton VIC 3168, Australia.

<sup>3</sup> Faculty of Pharmacy and Pharmaceutical Sciences, Monash University, VIC 3052, Australia

Correspondence to: Email [g.gody@warwick.ac.uk](mailto:g.gody@warwick.ac.uk) (G.G.); Email [s.perrier@warwick.ac.uk](mailto:s.perrier@warwick.ac.uk)  
(S.P.); Fax +44 2476 524112; Tel +44 2476 528085.

|              |                                                                                                                                                       |    |
|--------------|-------------------------------------------------------------------------------------------------------------------------------------------------------|----|
| Figure S1:   | Fraction of azoinitiator VA-044 consumed during the synthesis of the first two blocks PNAM <sub>20</sub> - <i>b</i> -PNAM <sub>20</sub> at 100°C..... | 4  |
| Equation S1: | Method to determine the decomposition rate constant $k_d$ .....                                                                                       | 5  |
| Figure S2:   | Comparison of the temperature profiles obtained in conventional radical polymerization and RAFT polymerization.....                                   | 6  |
| Figure S3:   | <sup>1</sup> H NMR spectrum of the RAFT homopolymerization of NAM (DP = 20) at 100°C.....                                                             | 7  |
| Figure S4:   | Comparison of the temperature profiles obtained in RAFT polymerization (with or without azoinitiator) and in conventional radical polymerization...   | 8  |
| Figure S5:   | Temperature profile / monomer conversion / fraction of VA-044 consumed in NAM RAFT homopolymerization (DP = 20) at 100°C.....                         | 9  |
| Figure S6:   | SEC chromatogram of the PNAM <sub>20</sub> synthesized at 100°C.....                                                                                  | 10 |
| Figure S7:   | Comparison of SEC chromatograms of PNAM <sub>20</sub> synthesized at 70°C (2 hours) or 100°C (3 min).....                                             | 11 |
| Figure S8:   | ESI-ToF spectrum of the PNAM <sub>10</sub> synthesized at 100°C.....                                                                                  | 12 |
| Figure S9:   | Monomer conversion / SEC chromatograms / molar mass and $\bar{D}$ data obtained for the synthesis of the multiblock <b>b</b> .....                    | 13 |
| Figure S10:  | Monomer conversion / SEC chromatograms / molar mass and $\bar{D}$ data obtained for the synthesis of the multiblock <b>c</b> .....                    | 14 |
| Figure S11:  | Monomer conversion / SEC chromatograms / molar mass and $\bar{D}$ data obtained for the synthesis of the multiblock <b>d</b> .....                    | 15 |
| Figure S12:  | Monomer conversion / SEC chromatograms / molar mass and $\bar{D}$ data obtained for the synthesis of the multiblock <b>e</b> .....                    | 16 |
| Figure S13:  | SEC chromatograms / molar mass and $\bar{D}$ data obtained for the synthesis of the homopolymer <b>f</b> .....                                        | 17 |
| Figure S14:  | SEC chromatograms / molar mass and $\bar{D}$ data obtained for the synthesis of the homopolymer <b>g</b> .....                                        | 18 |
| Figure S15:  | Influence of a thermoresponsive block PDEA <sub>20</sub> on the molar mass control for two pentablock copolymers. SEC chromatograms comparison.....   | 19 |
| Figure S16:  | SEC chromatograms / molar mass and $\bar{D}$ data obtained for the synthesis of the multiblock <b>i</b> .....                                         | 20 |
| Figure S17:  | SEC chromatograms / molar mass and $\bar{D}$ data obtained for the synthesis of the multiblock <b>j</b> .....                                         | 21 |
| Figure S18:  | SEC chromatograms / molar mass and $\bar{D}$ data obtained for the synthesis of the multiblock <b>k</b> .....                                         | 22 |

|             |                                                                                                                   |    |
|-------------|-------------------------------------------------------------------------------------------------------------------|----|
| Figure S19: | SEC chromatograms / molar mass and $\mathcal{D}$ data obtained for the synthesis of the multiblock <b>l</b> ..... | 23 |
| Figure S20: | SEC chromatograms / molar mass and $\mathcal{D}$ data obtained for the synthesis of the multiblock <b>m</b> ..... | 24 |
| Figure S21: | SEC chromatograms / molar mass and $\mathcal{D}$ data obtained for the synthesis of the multiblock <b>n</b> ..... | 25 |
| Figure S22: | SEC chromatograms / molar mass and $\mathcal{D}$ data obtained for the synthesis of the multiblock <b>o</b> ..... | 26 |
| Table S1:   | Experimental conditions for the preparation of the multiblock <b>a</b> .....                                      | 27 |
| Table S2:   | Experimental conditions for the preparation of the multiblock <b>b</b> .....                                      | 28 |
| Table S3:   | Experimental conditions for the preparation of the multiblock <b>c</b> .....                                      | 29 |
| Table S4:   | Experimental conditions for the preparation of the multiblock <b>d</b> .....                                      | 30 |
| Table S5:   | Experimental conditions for the preparation of the multiblock <b>e</b> .....                                      | 31 |
| Table S6:   | Experimental conditions for the preparation of the multiblock <b>f</b> .....                                      | 32 |
| Table S7:   | Experimental conditions for the preparation of the multiblock <b>g</b> .....                                      | 33 |
| Table S8:   | Experimental conditions for the preparation of the multiblock <b>h</b> .....                                      | 34 |
| Table S9:   | Experimental conditions for the preparation of the multiblock <b>i</b> .....                                      | 35 |
| Table S10:  | Experimental conditions for the preparation of the multiblock <b>j</b> .....                                      | 36 |
| Table S11:  | Experimental conditions for the preparation of the multiblock <b>k</b> .....                                      | 37 |
| Table S12:  | Experimental conditions for the preparation of the multiblock <b>l</b> .....                                      | 38 |
| Table S13:  | Experimental conditions for the preparation of the multiblock <b>m</b> .....                                      | 39 |
| Table S14:  | Experimental conditions for the preparation of the multiblock <b>n</b> .....                                      | 40 |
| Table S15:  | Experimental conditions for the preparation of the multiblock <b>o</b> .....                                      | 41 |

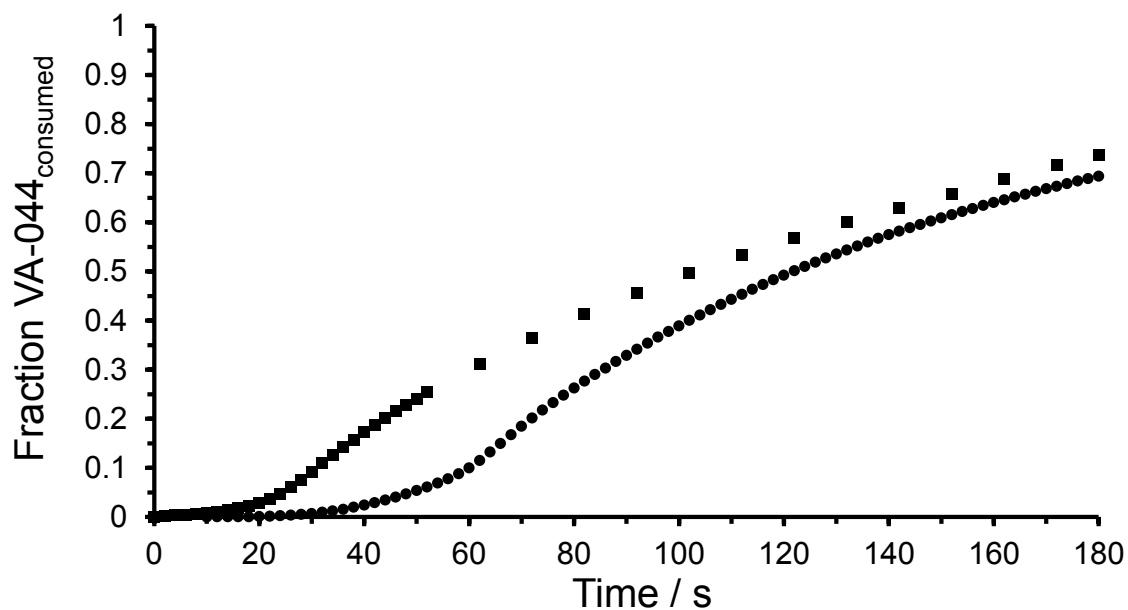

**Figure S1.** Comparison of the fraction of azoinitiator VA-044 consumed during the 1<sup>st</sup> block (circles) and the 2<sup>nd</sup> block (squares) (see Table S2, cycles 1 and 2 for experimental RAFT conditions) calculated using equation S1 (see below) and the temperature profile (Figure S2) obtained during the synthesis of PNAM<sub>20</sub>-*b*-PNAM<sub>20</sub> via RAFT polymerization in the presence of air and without degassing (oil bath thermostated at 100°C).

## Method to determine the decomposition rate constant $k_d$

Arrhenius equation:  $k_d = A e^{\frac{-E_A}{RT}}$ , where  $k_d$  is the decomposition rate constant (in  $s^{-1}$ ) of the azoinitiator,  $A$  the pre-exponential factor,  $E_A$  the activation energy (in  $J.mol^{-1}$ ),  $R$  the Universal gas constant ( $= 8.31 J.mol^{-1}.K^{-1}$ ) and  $T$  the temperature (in K).

$k_d$  values for VA-044 are determined by using Equation S1 based on the temperature profile recorded (Figure S5):

$$A = \frac{k_{d(317K)}}{e^{\frac{-E_A}{RT_{(317K)}}}} = \frac{k_{d(x K)}}{e^{\frac{-E_A}{RT_{(x K)}}}} \quad (\text{Equation S1})$$

Where  $x$  is the unknown temperature. A value of  $108\,000 J.mol^{-1}$  is used for  $E_A$  (obtained from Wako, <http://www.wako-chem.co.jp/specialty/waterazo/VA-044.htm>).

As an example, the table below shows  $k_d$  values determined for VA-044 by using Equation S1 and the temperature profile recorded during the first block PNAM<sub>20</sub>.

| T (K)   | kd(VA-044) | Time (s) | [VA-044]t | [VA-044]consumed | $k_d$   | Time (s) | $k_d$ | Time (s) | $k_d$ |
|---------|------------|----------|-----------|------------------|---------|----------|-------|----------|-------|
| 301.800 | 2.44E-06   | 6        | 1.000     | 0.000            | 370.100 | 7.47E-03 | 90    | 0.686    | 0.314 |
| 301.500 | 2.34E-06   | 8        | 1.000     | 0.000            | 370.300 | 7.47E-03 | 92    | 0.675    | 0.325 |
| 312.200 | 1.02E-05   | 10       | 1.000     | 0.000            | 370.500 | 7.13E-03 | 94    | 0.666    | 0.334 |
| 318.600 | 2.36E-05   | 12       | 1.000     | 0.000            | 369.700 | 7.13E-03 | 96    | 0.656    | 0.344 |
| 323.400 | 4.32E-05   | 14       | 1.000     | 0.000            | 369.500 | 7.13E-03 | 98    | 0.647    | 0.353 |
| 327.700 | 7.32E-05   | 16       | 1.000     | 0.000            | 369.400 | 6.42E-03 | 100   | 0.639    | 0.361 |
| 331.700 | 1.18E-04   | 18       | 0.999     | 0.001            | 369.400 | 6.42E-03 | 102   | 0.631    | 0.369 |
| 337.400 | 2.29E-04   | 20       | 0.999     | 0.001            | 369.400 | 6.42E-03 | 104   | 0.623    | 0.377 |
| 339.000 | 2.74E-04   | 22       | 0.998     | 0.002            | 369.500 | 6.48E-03 | 106   | 0.615    | 0.385 |
| 343.400 | 4.48E-04   | 24       | 0.998     | 0.002            | 369.500 | 6.48E-03 | 108   | 0.607    | 0.393 |
| 346.900 | 6.56E-04   | 26       | 0.996     | 0.004            | 369.600 | 6.48E-03 | 110   | 0.599    | 0.401 |
| 348.800 | 8.05E-04   | 28       | 0.995     | 0.005            | 369.600 | 6.48E-03 | 112   | 0.591    | 0.409 |
| 350.800 | 9.95E-04   | 30       | 0.993     | 0.007            | 369.700 | 6.48E-03 | 114   | 0.584    | 0.416 |
| 352.600 | 1.20E-03   | 32       | 0.990     | 0.010            | 369.800 | 6.67E-03 | 116   | 0.576    | 0.424 |
| 354.500 | 1.46E-03   | 34       | 0.987     | 0.013            | 368.900 | 6.67E-03 | 118   | 0.568    | 0.432 |
| 356.400 | 1.78E-03   | 36       | 0.984     | 0.016            | 368.900 | 6.67E-03 | 120   | 0.561    | 0.439 |
| 358.100 | 2.12E-03   | 38       | 0.980     | 0.020            | 368.900 | 6.67E-03 | 122   | 0.553    | 0.447 |
| 359.700 | 2.49E-03   | 40       | 0.975     | 0.025            | 368.700 | 6.67E-03 | 124   | 0.546    | 0.454 |
| 361.200 | 2.89E-03   | 42       | 0.969     | 0.031            | 368.700 | 6.67E-03 | 126   | 0.539    | 0.461 |
| 362.600 | 3.32E-03   | 44       | 0.963     | 0.037            | 368.700 | 6.67E-03 | 128   | 0.531    | 0.469 |
| 364.200 | 3.89E-03   | 46       | 0.955     | 0.045            | 368.700 | 6.67E-03 | 130   | 0.524    | 0.476 |
| 365.900 | 4.59E-03   | 48       | 0.947     | 0.053            | 368.600 | 6.67E-03 | 132   | 0.518    | 0.482 |
| 367.600 | 5.41E-03   | 50       | 0.936     | 0.064            | 368.600 | 6.67E-03 | 134   | 0.511    | 0.489 |
| 368.500 | 5.89E-03   | 52       | 0.925     | 0.075            | 368.600 | 5.95E-03 | 136   | 0.505    | 0.495 |
| 370.100 | 6.86E-03   | 54       | 0.913     | 0.087            | 368.600 | 5.95E-03 | 138   | 0.499    | 0.501 |
| 371.400 | 7.76E-03   | 56       | 0.899     | 0.101            | 368.600 | 5.95E-03 | 140   | 0.493    | 0.507 |
| 372.000 | 8.21E-03   | 58       | 0.884     | 0.116            | 368.600 | 5.95E-03 | 142   | 0.487    | 0.513 |
| 372.300 | 8.45E-03   | 60       | 0.869     | 0.131            | 368.600 | 5.95E-03 | 144   | 0.481    | 0.519 |
| 372.500 | 8.60E-03   | 62       | 0.855     | 0.145            | 368.600 | 5.95E-03 | 146   | 0.475    | 0.525 |
| 372.400 | 8.52E-03   | 64       | 0.840     | 0.160            | 368.600 | 5.95E-03 | 148   | 0.470    | 0.530 |
| 372.300 | 8.45E-03   | 66       | 0.826     | 0.174            | 368.600 | 5.95E-03 | 150   | 0.464    | 0.536 |
| 372.300 | 8.45E-03   | 68       | 0.812     | 0.188            | 368.600 | 5.95E-03 | 152   | 0.459    | 0.541 |
| 372.200 | 8.37E-03   | 70       | 0.799     | 0.201            | 368.600 | 5.95E-03 | 154   | 0.453    | 0.547 |
| 372.000 | 8.21E-03   | 72       | 0.786     | 0.214            | 368.600 | 5.95E-03 | 156   | 0.448    | 0.552 |
| 371.700 | 7.98E-03   | 74       | 0.773     | 0.227            | 368.600 | 5.95E-03 | 158   | 0.443    | 0.557 |
| 371.400 | 7.76E-03   | 76       | 0.761     | 0.239            | 368.600 | 5.95E-03 | 160   | 0.437    | 0.563 |
| 371.200 | 7.62E-03   | 78       | 0.750     | 0.250            | 368.600 | 5.95E-03 | 162   | 0.432    | 0.568 |
| 371.000 | 7.47E-03   | 80       | 0.739     | 0.261            | 368.600 | 5.95E-03 | 164   | 0.427    | 0.573 |
| 371.600 | 7.47E-03   | 82       | 0.728     | 0.272            | 368.600 | 5.95E-03 | 166   | 0.422    | 0.578 |
| 370.600 | 7.47E-03   | 84       | 0.717     | 0.283            | 368.600 | 5.95E-03 | 168   | 0.417    | 0.583 |
| 370.300 | 7.47E-03   | 86       | 0.706     | 0.294            | 368.600 | 5.95E-03 | 170   | 0.412    | 0.588 |
| 370.200 | 7.47E-03   | 88       | 0.696     | 0.304            | 368.600 | 5.95E-03 | 172   | 0.407    | 0.593 |
| 370.100 | 7.47E-03   | 90       | 0.686     | 0.314            | 368.600 | 5.95E-03 | 174   | 0.402    | 0.598 |
|         |            |          |           |                  | 368.600 | 5.95E-03 | 176   | 0.398    | 0.602 |

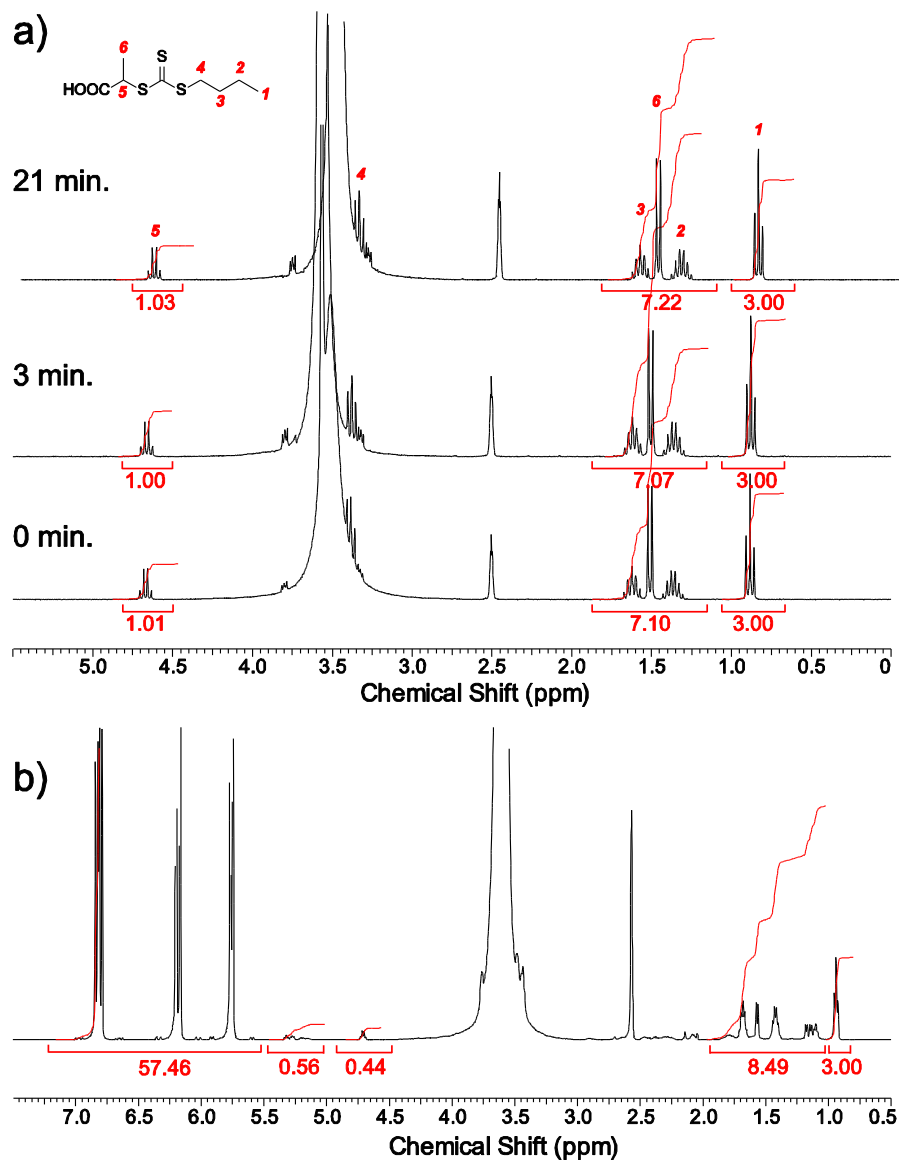

**Figure S2.** (a) Comparison of the  $^1\text{H}$  NMR spectra (DMSO- $d_6$ , 300 MHz) of the RAFT agent PABTC after 0, 3, and 21 minutes in a mixture H<sub>2</sub>O/dioxane (80/20, v/v). Peak integration shows no degradation of the CTA. b)  $^1\text{H}$  NMR spectrum (DMSO- $d_6$ , 300 MHz) of the mixture of NAM and chain transfer agent (without azoinitiator) after 3 min in H<sub>2</sub>O/dioxane (80/20, v/v) at 100°C in the presence of air and without degassing. Less than 4% of monomer conversion is obtained.

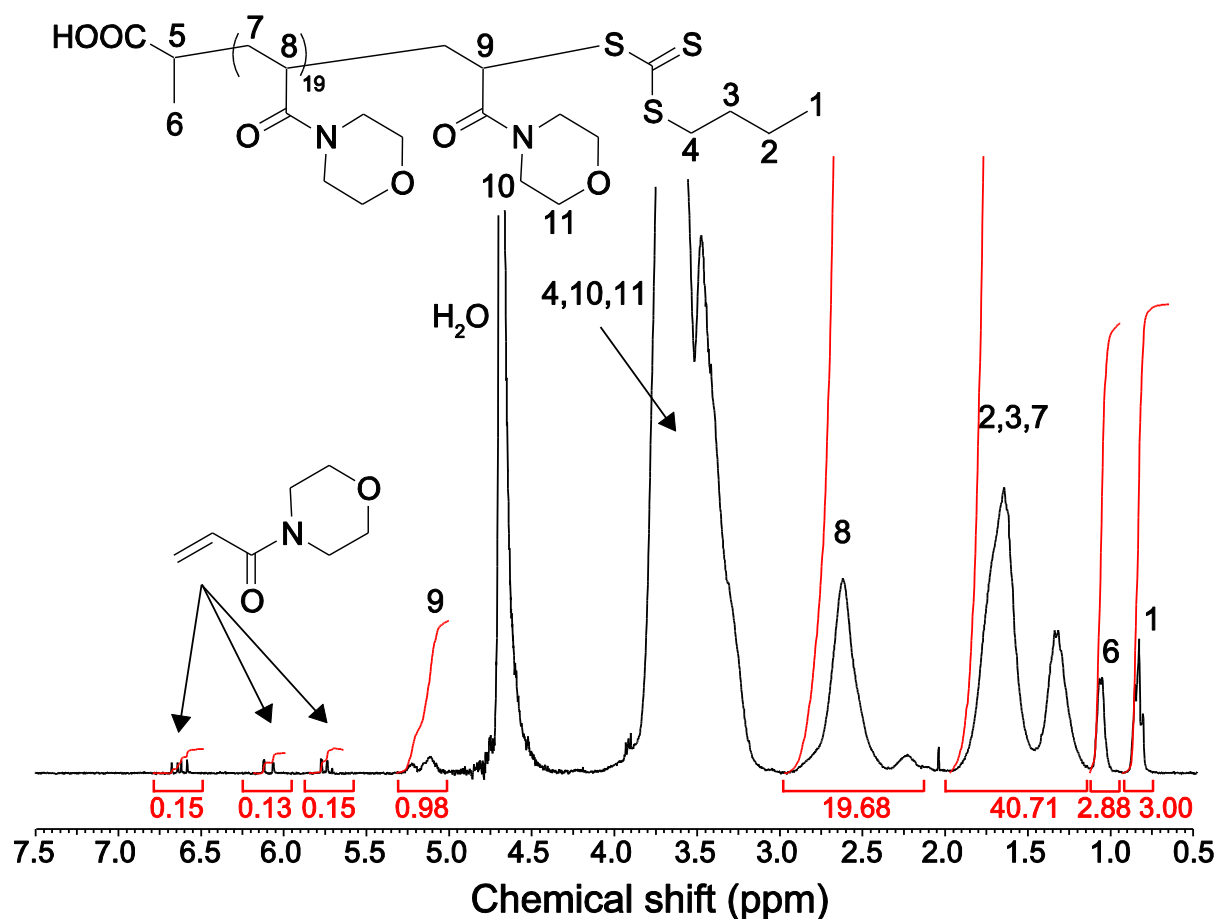

**Figure S3.**  $^1\text{H}$  NMR spectrum ( $\text{D}_2\text{O}$ , 300 MHz) of the polymerization mixture NAM/CTA/VA-044 : 20/1/0.01 (Table S2, cycle 1) after 3 min of RAFT polymerization in  $\text{H}_2\text{O}$ /dioxane (80/20, v/v) at  $100^\circ\text{C}$  in the presence of air and without degassing (monomer conversion >99%). Comparison of the integrals of 1 with 9 and 6 shows that the CTA does not degrade in the chosen reaction conditions and is fully consumed.

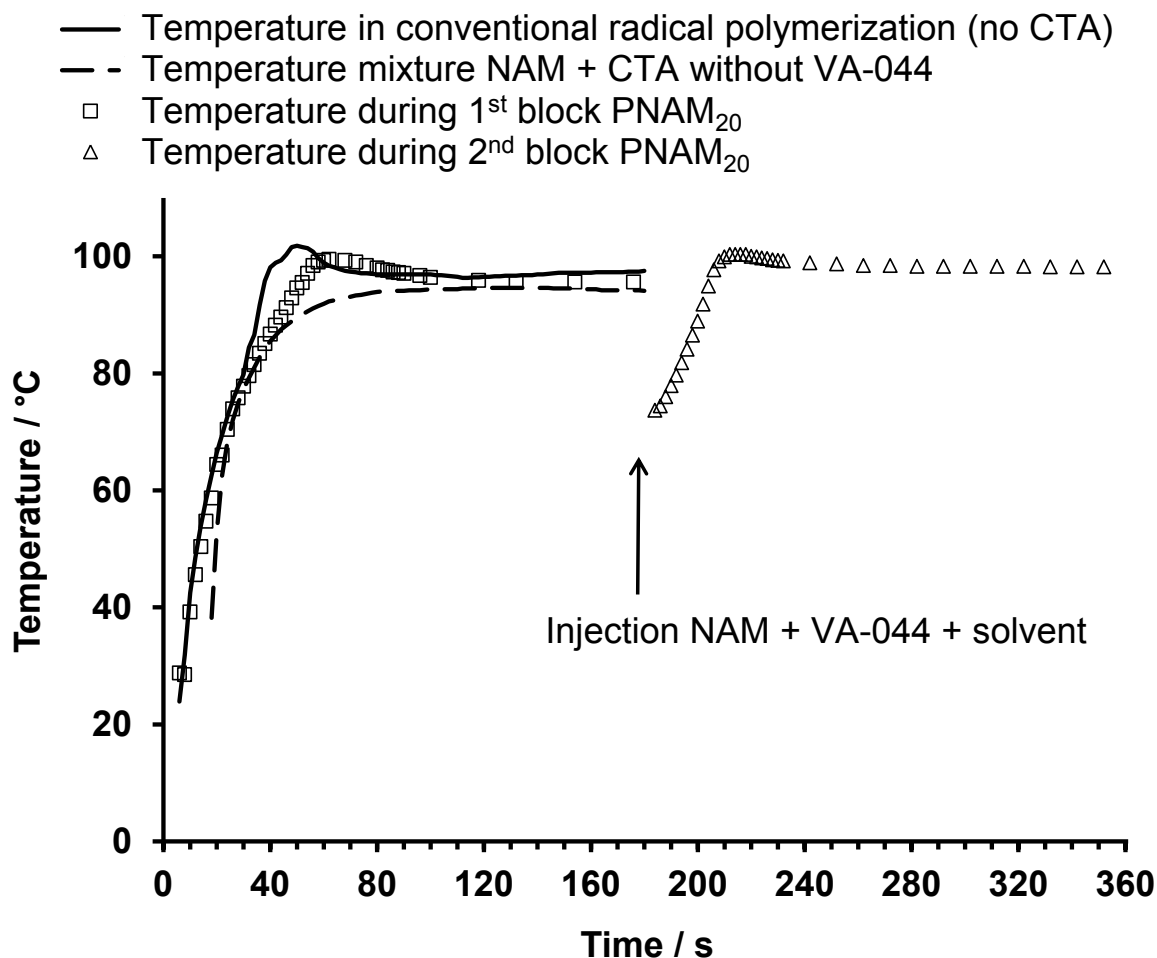

**Figure S4.** Comparison of the temperature profiles obtained for the NAM homopolymerization by conventional radical polymerization (full line), by RAFT polymerization (empty squares) ( $DP_{\text{targeted}} = 20$ , see Table S2, cycle 1 for the RAFT polymerization conditions) and for the polymerization mixture without azoinitiator. The  $[VA-044]_0$  used for the conventional radical polymerization is the same than the one in the RAFT process. The temperature profile obtained during the one-pot chain extension with NAM is represented (empty triangles) (see Table S2, cycle 2 for reaction conditions). All the experiments were performed in the presence of air and without degassing.



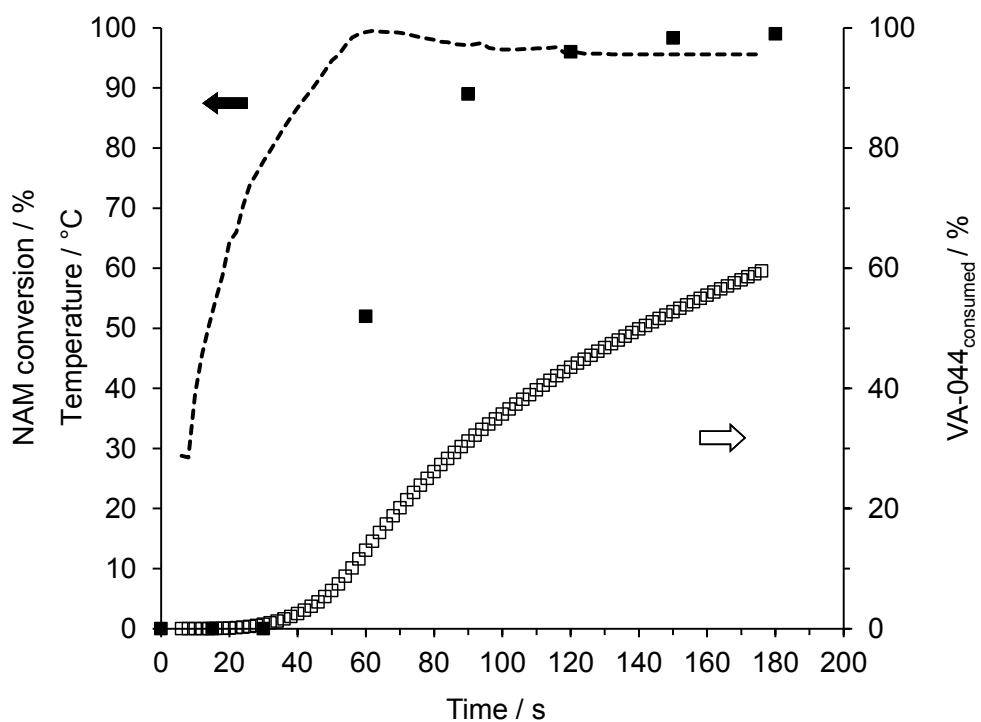

**Figure S5.** Monomer conversion (full square), percentage of VA-044 consumed (empty square, Equation S1), and temperature (dash line) versus time for the RAFT homopolymerization of NAM in the presence of air and without degassing ( $DP_{\text{targeted}} = 20$ , see Table S2, cycle 1 for the polymerization conditions).

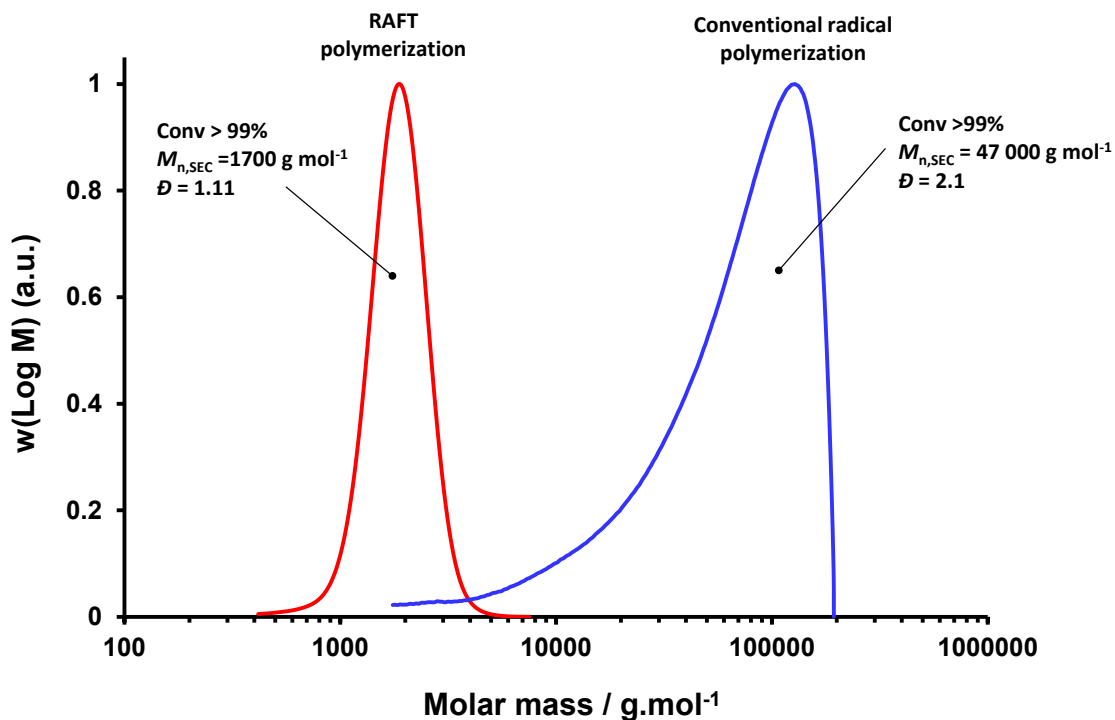

**Figure S6.** Comparison of the SEC chromatograms of the polymer obtained by conventional radical polymerization of NAM and the PNAM<sub>20</sub> (DP<sub>targeted</sub> = 20, Table S2, cycle 1) synthesized by ultrafast RAFT polymerization in the same conditions (H<sub>2</sub>O/dioxane : 80/20, v/v at 100°C in the presence of air and without degassing). SEC analyses were performed in THF with PSty standards.

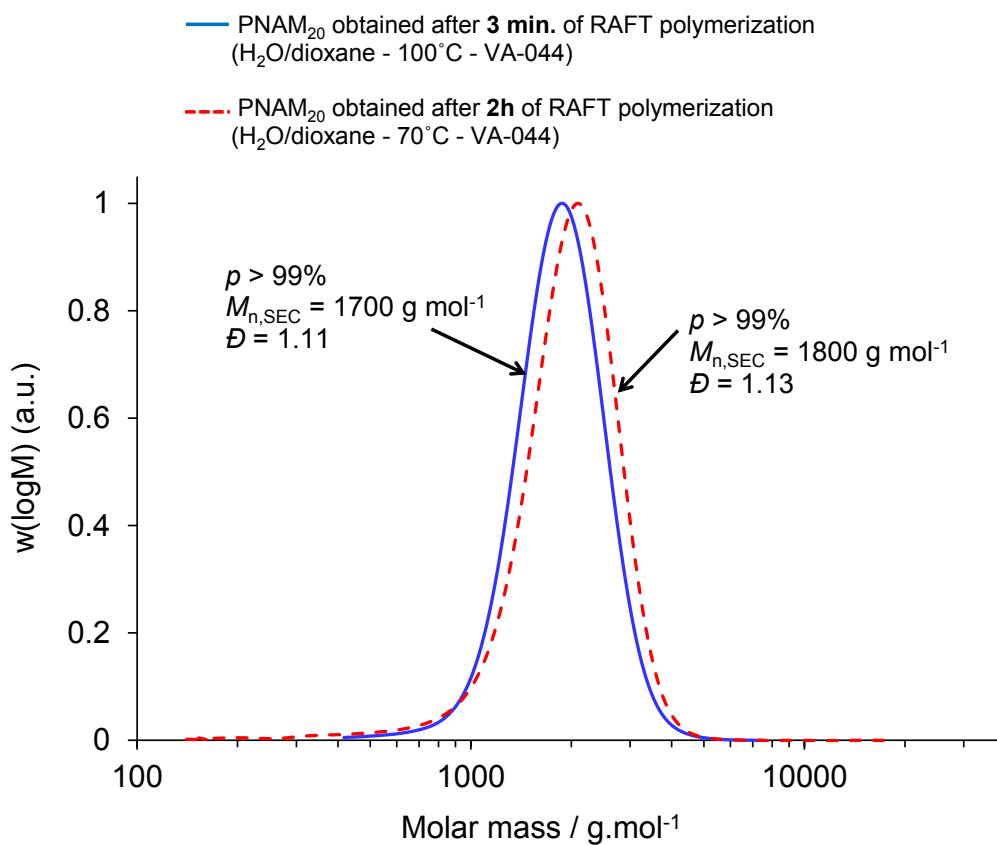

**Figure S7.** Comparison of the SEC chromatograms of PNAM<sub>20</sub> synthesized with VA-044 as azoinitiator, in H<sub>2</sub>O/dioxane (80/20, v/v), either at 70°C under argon for 2 hours or at 100°C in the presence of air and without degassing for 3 min. SEC analyses were performed on the THF system with PSty standards.

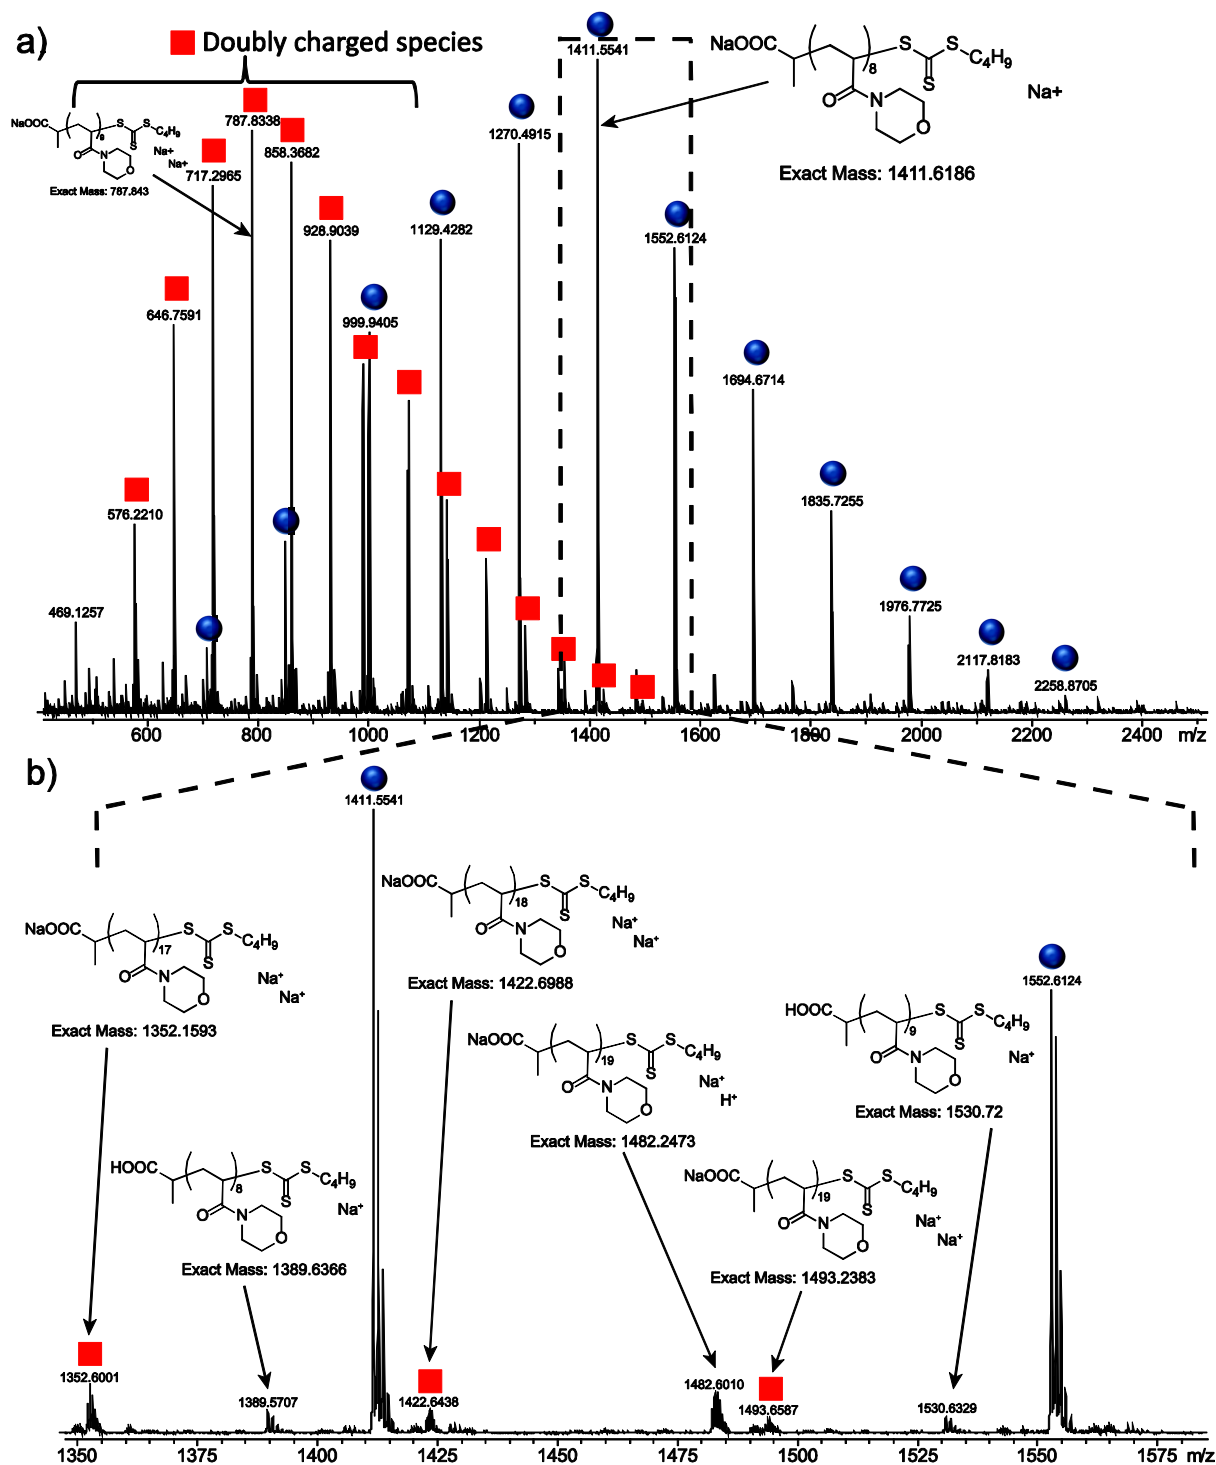

**Figure S8.** (a) ESI-ToF spectrum and (b) enlargement of the corresponding spectrum showing the excellent retention and stability of the RAFT end-group (no hydrolysis and no degradation) after 3 min of RAFT polymerization performed at 100°C in a mixture dioxane/H<sub>2</sub>O (75/25, v/v) in the presence of air and without degassing (i.e., same conditions than the one described in Table S1).

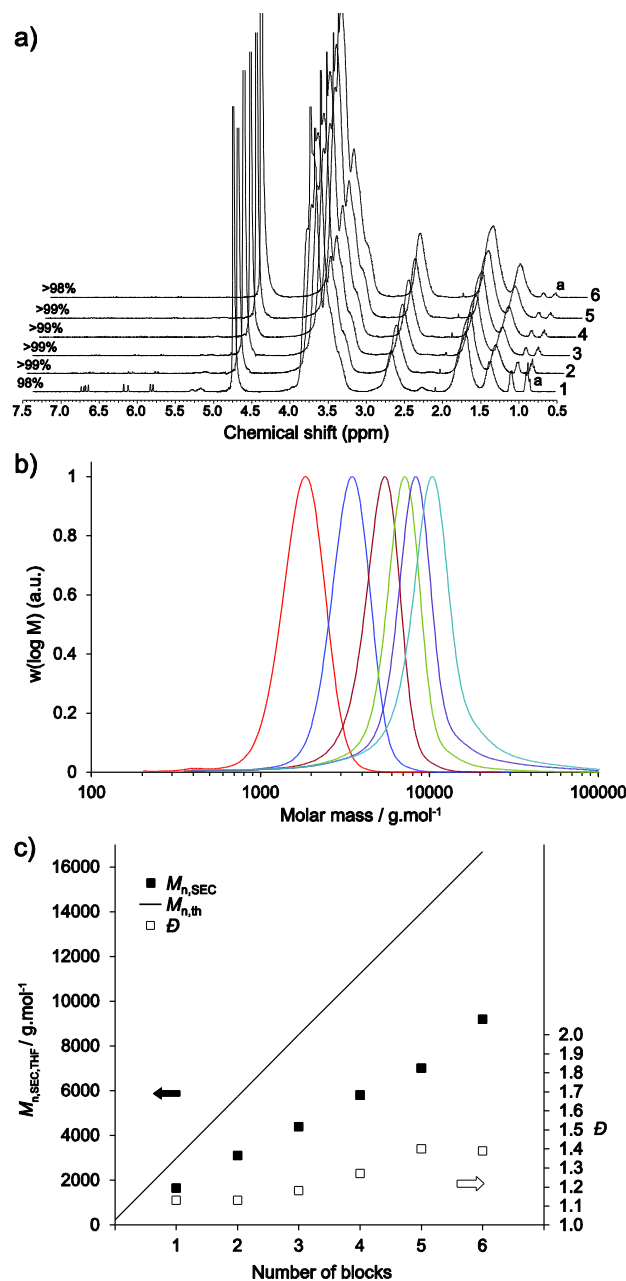

**Figure S9.** (a) <sup>1</sup>H NMR spectra (D<sub>2</sub>O, 300 MHz) showing the conversion of NAM for each new block after 3 min of iterative RAFT polymerizations performed in the presence of air and without degassing; (b) SEC chromatograms for successive chain extension of the hexablock [PNAM<sub>20</sub>]<sub>6</sub> (Scheme 3 and Table 1, multiblock **b**) at 100 °C with VA-044 as initiator (3 min per block) (see Table S2 for reaction conditions); (c) Evolution of the number-average molar mass and dispersity with the number of blocks during the preparation of [PNAM<sub>20</sub>]<sub>6</sub>. The black line represents the theoretical molar mass calculated from Equation 2. The filled squares represent the experimental molar masses obtained by THF SEC. The empty squares represent the dispersity values as determined by THF SEC.

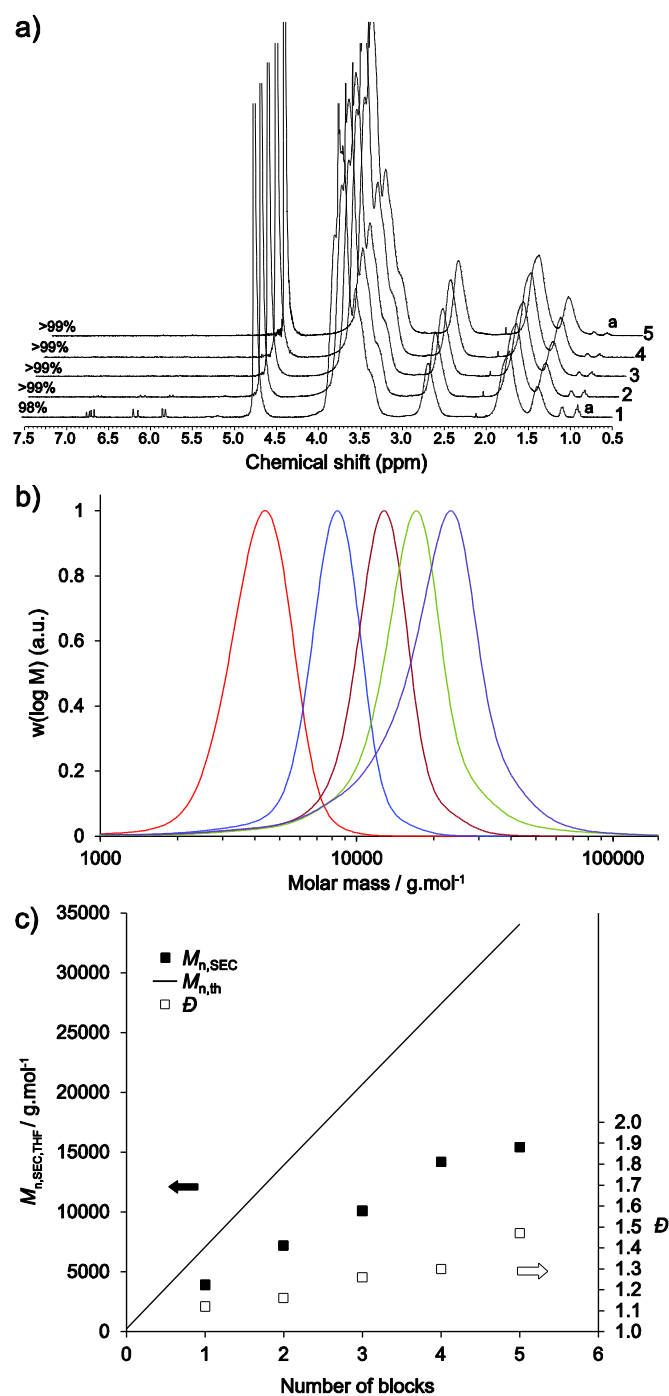

**Figure S10.** (a) <sup>1</sup>H NMR spectra (D<sub>2</sub>O, 300 MHz) showing the conversion of NAM for each new block after 3 min of iterative RAFT polymerizations performed in the presence of air and without degassing; (b) SEC chromatograms for successive chain extension of the pentablock [PNAM<sub>50</sub>]<sub>5</sub> (Scheme 3 and Table 1, multiblock c) at 100 °C with VA-044 as initiator (3 min per block) (see Table S3 for reaction conditions); (c) Evolution of the number-average molar masses and dispersity values with the number of blocks during the preparation of [PNAM<sub>50</sub>]<sub>5</sub>. The black line represents the theoretical molar mass calculated from Equation 2. The filled squares represent the experimental molar masses obtained by THF SEC. The empty squares represent the dispersity values as determined by THF SEC.

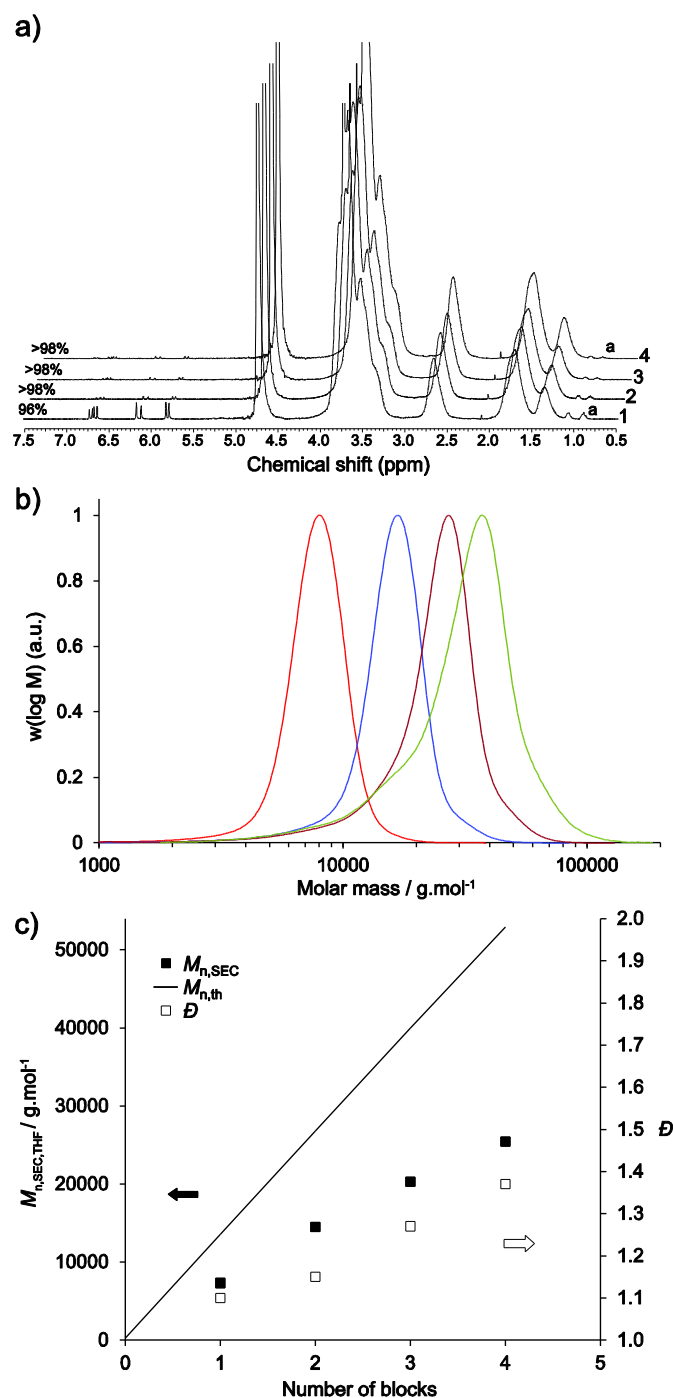

**Figure S11.** (a)  $^1\text{H}$  NMR spectra ( $\text{D}_2\text{O}$ , 300 MHz) showing the conversion of NAM for each new block after 3 min of iterative RAFT polymerizations performed in the presence of air and without degassing; (b) SEC chromatograms for successive chain extension of the tetrablock  $[\text{PNAM}_{100}]_4$  (Scheme 3 and Table 1, multiblock **d**) at  $100^\circ\text{C}$  with VA-044 as initiator (3 min per block) (see Table S4 for reaction conditions); (c) Evolution of the number-average molar masses and dispersity values with the number of blocks during the preparation of  $[\text{PNAM}_{100}]_4$ . The black line represents the theoretical molar mass calculated from Equation 2. The filled squares represent the experimental molar masses obtained by THF SEC. The empty squares represent the dispersity values as determined by THF SEC.

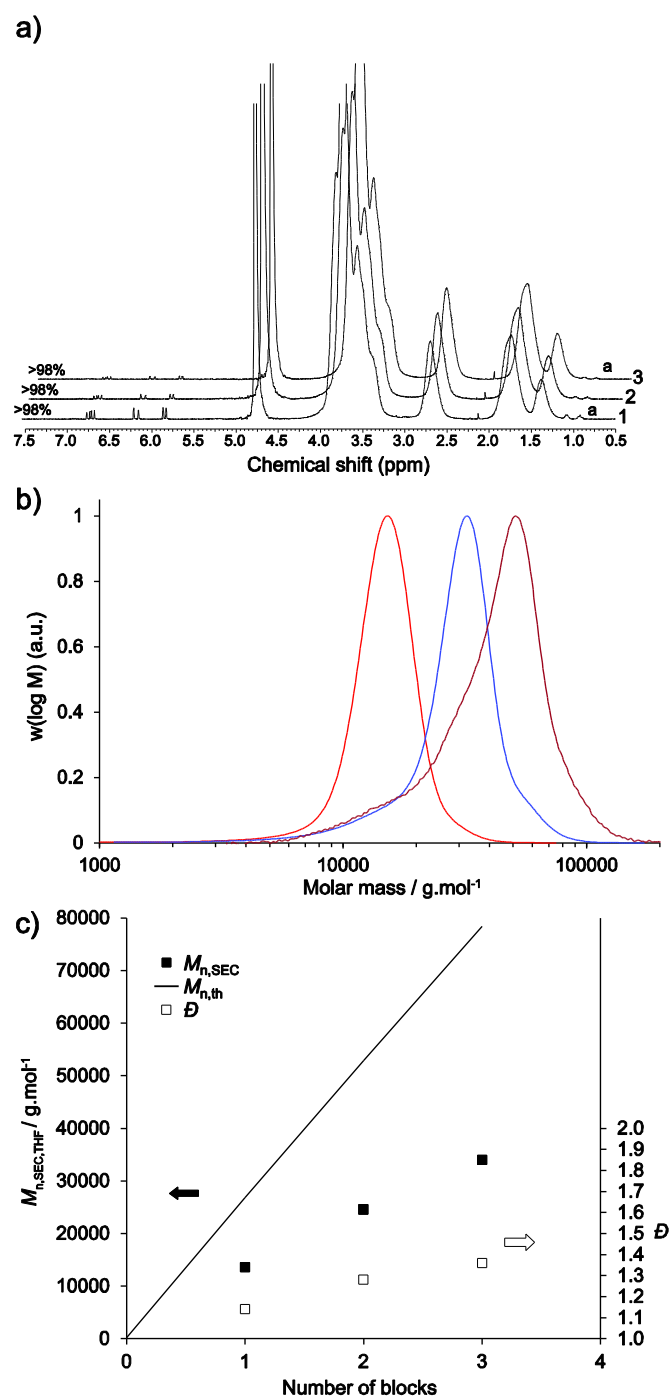

**Figure S12.** (a)  $^1\text{H}$  NMR spectra (D<sub>2</sub>O, 300 MHz) showing the conversion of NAM for each new block after 3 min of iterative RAFT polymerizations performed in the presence of air and without degassing; (b) SEC chromatograms for successive chain extension of the triblock [PNAM<sub>200</sub>]<sub>3</sub> (Scheme 3 and Table 1, multiblock e) at 100°C with VA-044 as initiator (3 min per block) (see Table S5 for reaction conditions); (c) Evolution of the number-average molar masses and dispersity values with the number of blocks during the preparation of [PNAM<sub>200</sub>]<sub>3</sub>. The black line represents the theoretical molar mass calculated from Equation 2. The filled squares represent the experimental molar masses obtained by THF SEC. The empty squares represent the dispersity values as determined by THF SEC.



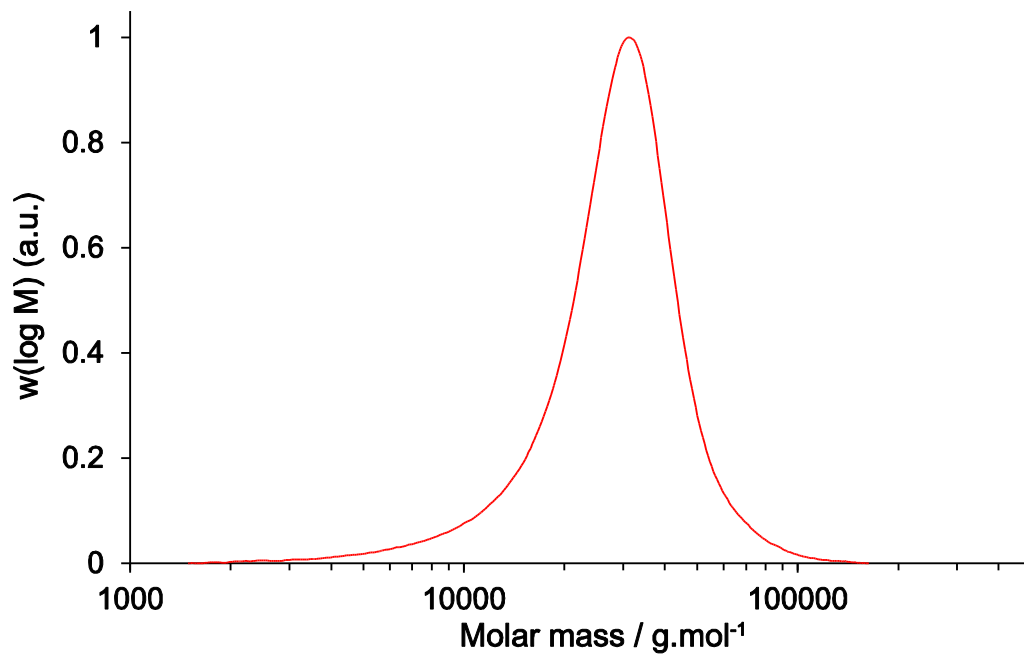

**Figure S13.** SEC chromatogram of the homopolymer PNAM<sub>400</sub> (Scheme 3 and Table 1, homopolymer **f**) synthesized by RAFT polymerization at 100°C with VA-044 as initiator (3 min per block), in the presence of air and without degassing. SEC was performed on the THF system. Refer to Table S6 for exact reaction conditions.

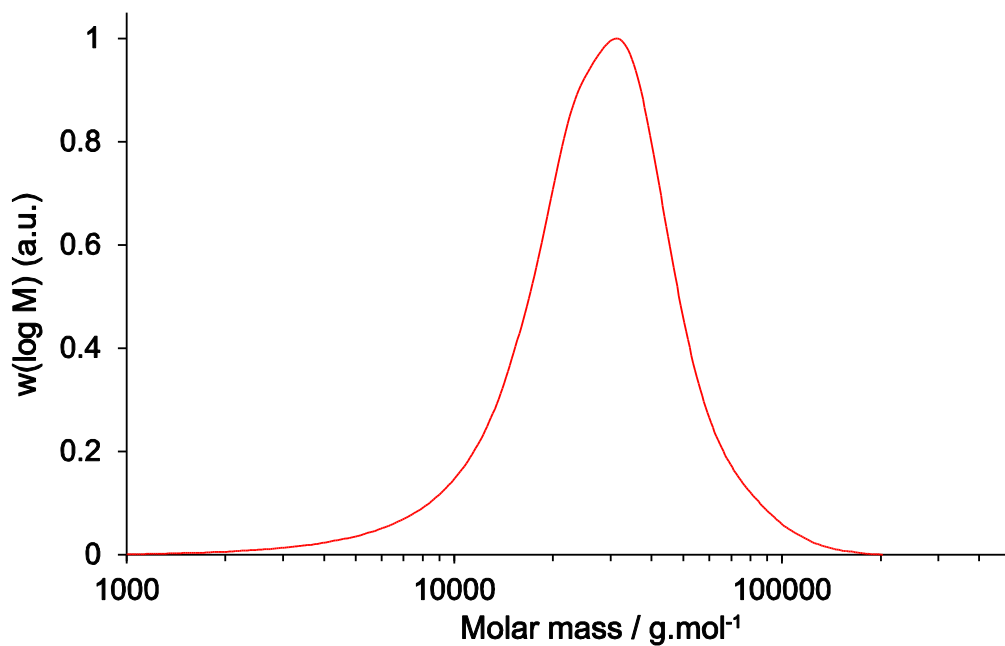

**Figure S14.** SEC chromatogram of the homopolymer PNAM<sub>600</sub> (Scheme 3 and Table 1, homopolymer **g**) synthesized by RAFT polymerization at 100°C with VA-044 as initiator (3 min per block), in the presence of air and without degassing. SEC was performed on the THF system. Refer to Table S7 for exact reaction conditions.

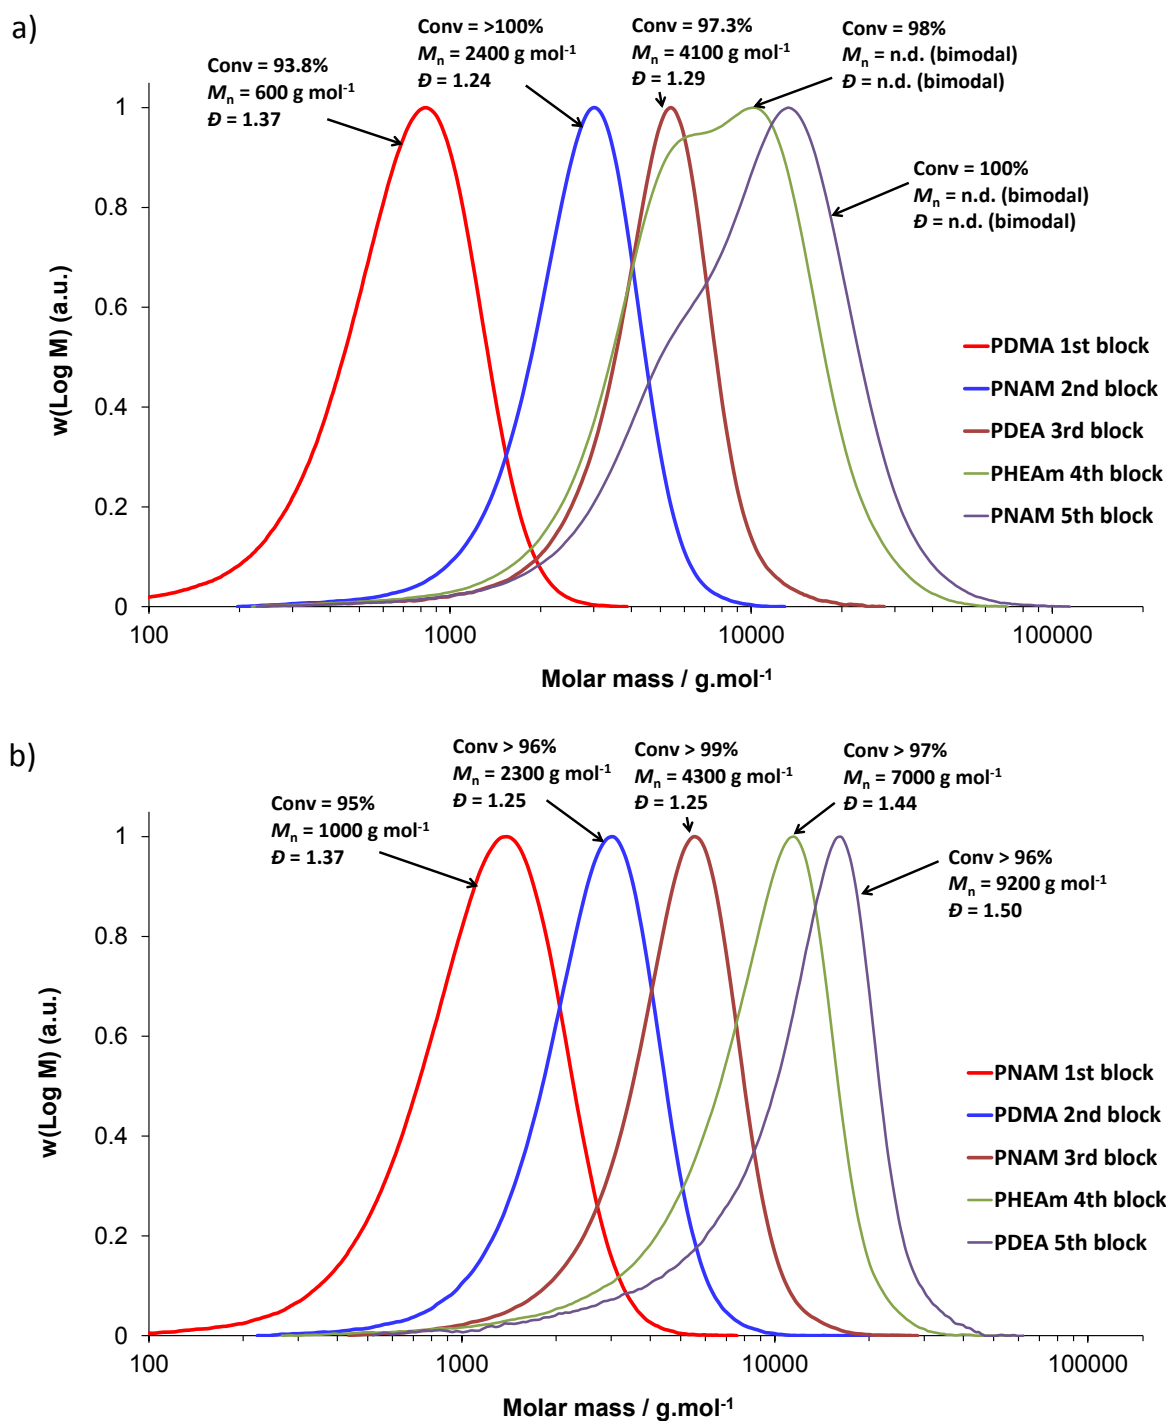

**Figure S15.** Comparison of the SEC chromatograms of the two pentablock copolymers (a) PNAM<sub>20</sub>-*b*-PDMA<sub>20</sub>-*b*-PDEA<sub>20</sub>-*b*-PHEAm<sub>20</sub>-*b*-PNAM<sub>20</sub> and (b) PNAM<sub>20</sub>-*b*-PDMA<sub>20</sub>-*b*-PNAM<sub>20</sub>-*b*-PHEAm<sub>20</sub>-*b*-PDEA<sub>20</sub> showing the impact of having the thermoresponsive block PDEA<sub>20</sub> as the 3<sup>rd</sup> block or as the 5<sup>th</sup> block. Both multiblock copolymers have been prepared in similar condition (see Table S8) at 100°C with VA-044 as initiator (3 min per block) in the presence of air and without degassing. SEC analyses were performed on the DMF system with PMMA standards.

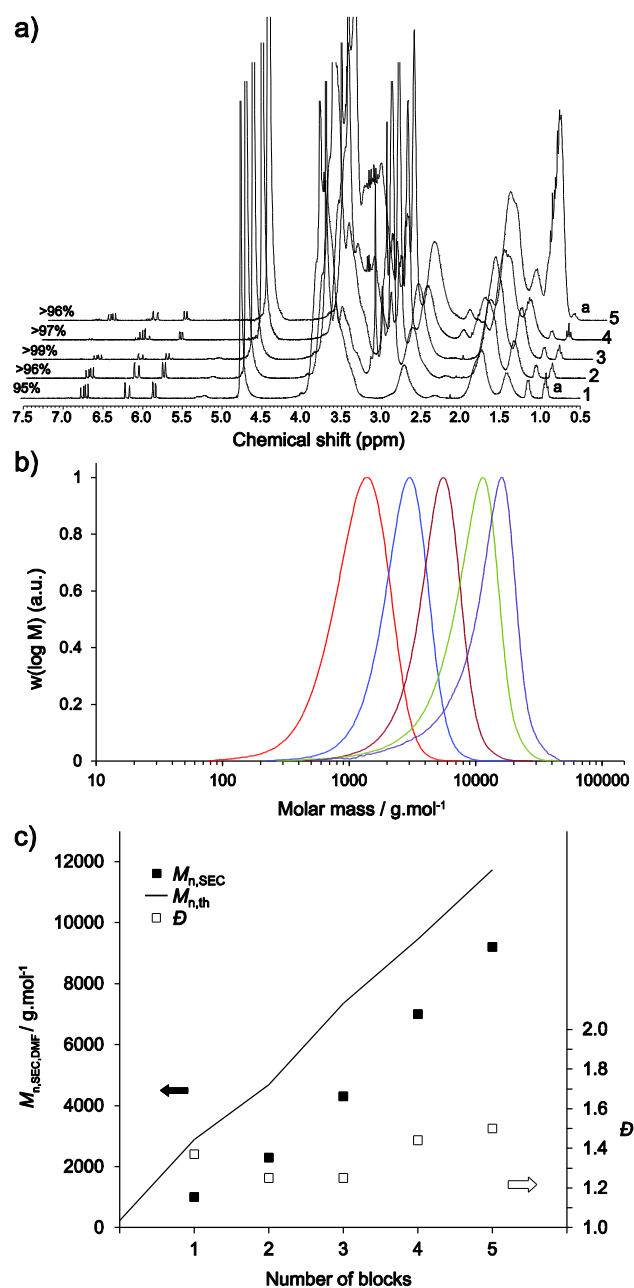

**Figure S16.** (a) <sup>1</sup>H NMR spectra (D<sub>2</sub>O, 300 MHz) showing the monomer conversion for each block after 3 min of iterative RAFT polymerization in the presence of air and without degassing; (b) SEC chromatograms for successive block extensions of the pentablock PNAM<sub>20</sub>-*b*-PDMA<sub>20</sub>-*b*-PNAM<sub>20</sub>-*b*-PHEAm<sub>20</sub>-*b*-PDEA<sub>20</sub> (Scheme 4 and Table 2, multiblock **i**) at 100°C with VA-044 as initiator (3 min per block) (see Table S9 for reaction conditions); (c) Evolution of the number-average molar mass and dispersity with the number of blocks during the preparation of the pentablock copolymer. The black line represents the theoretical molar mass calculated from Equation 2. The filled squares represent the experimental molar masses obtained by DMF SEC. The empty squares represent the dispersity values as determined by DMF SEC.

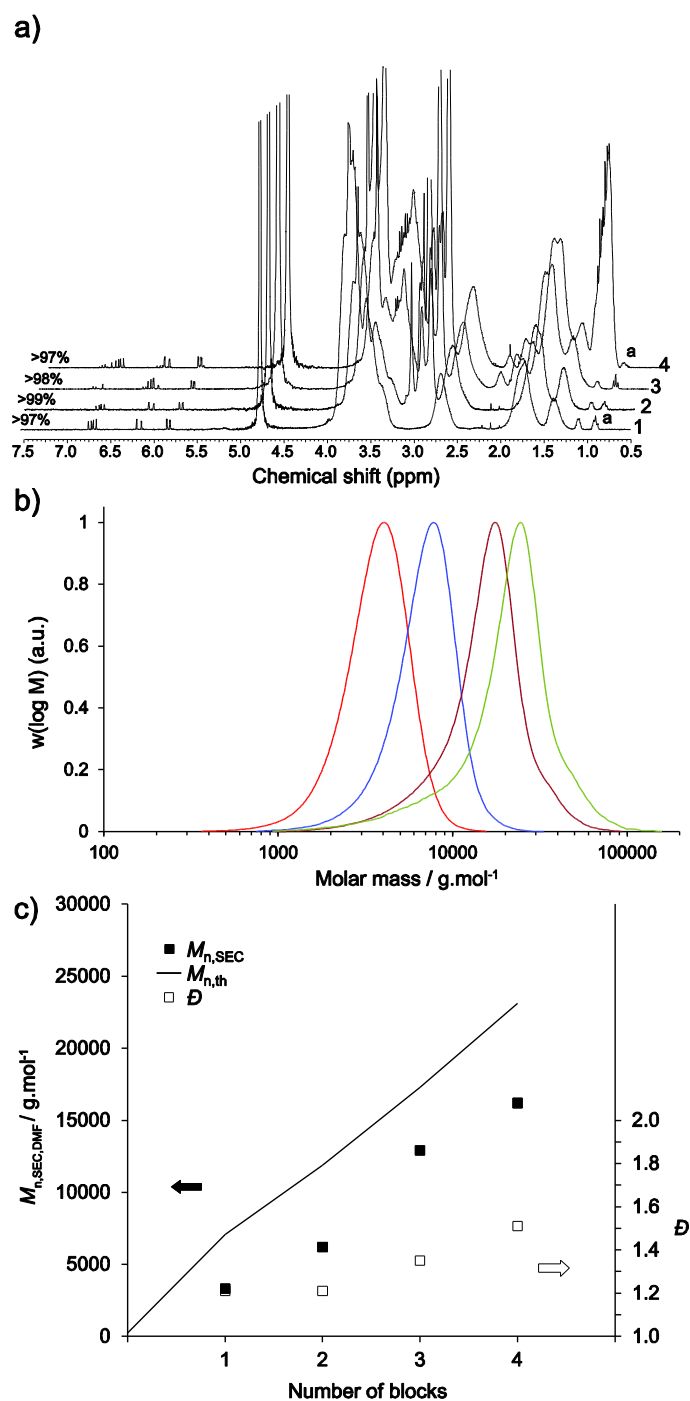

**Figure S17.** (a)  $^1\text{H}$  NMR spectra ( $\text{D}_2\text{O}$ , 300 MHz) showing the monomer conversion for each block after 3 min of iterative RAFT polymerization in the presence of air and without degassing; (b) MWDs for successive block extensions of the tetrablock  $\text{PNAM}_{50}\text{-}b\text{-PDMA}_{50}\text{-}b\text{-PHEAm}_{50}\text{-}b\text{-PDEA}_{50}$  (Scheme 4 and Table 2, multiblock **j**) at  $100^\circ\text{C}$  with VA-044 as initiator (3 min per block) (see Table S10 for reaction conditions); (c) Evolution of the number-average molar mass and dispersity with the number of blocks during the preparation of the tetrablock copolymer. The black line represents the theoretical molar mass calculated from Equation 2. The filled squares represent the experimental molar masses obtained by DMF SEC. The empty squares represent the dispersity values as determined by DMF SEC.

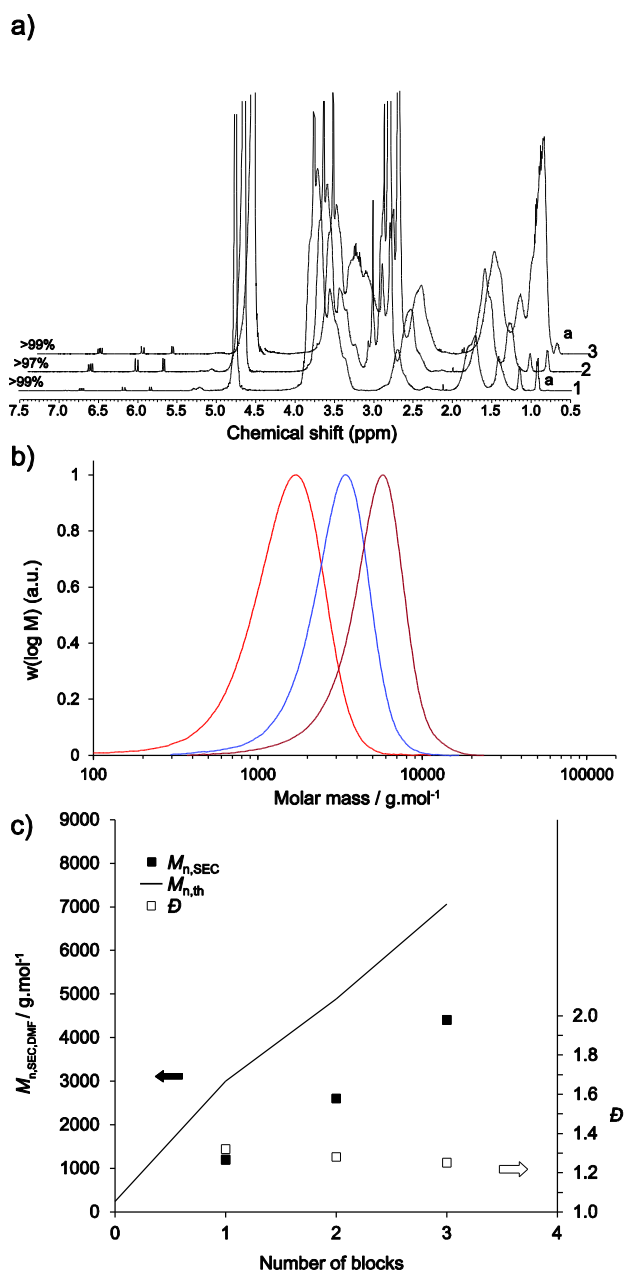

**Figure S18.** (a)  $^1\text{H}$  NMR spectra ( $\text{D}_2\text{O}$ , 300 MHz) showing the monomer conversion for each block after 3 min of iterative RAFT polymerization in the presence of air and without degassing; (b) MWDs for successive block extensions of the triblock  $\text{PNAM}_{20}\text{-}b\text{-PDMA}_{20}\text{-}b\text{-PHEAm}_{20}$  (Scheme 4 and Table 2, multiblock **k**) at  $100^\circ\text{C}$  with VA-044 as initiator (3 min per block) (see Table S11 for reaction conditions); (c) Evolution of the number-average molar mass and dispersity with the number of blocks during the preparation of the triblock copolymer. The black line represents the theoretical molar mass calculated from Equation 2. The filled squares represent the experimental molar masses obtained by DMF SEC. The empty squares represent the dispersity values as determined by DMF SEC.

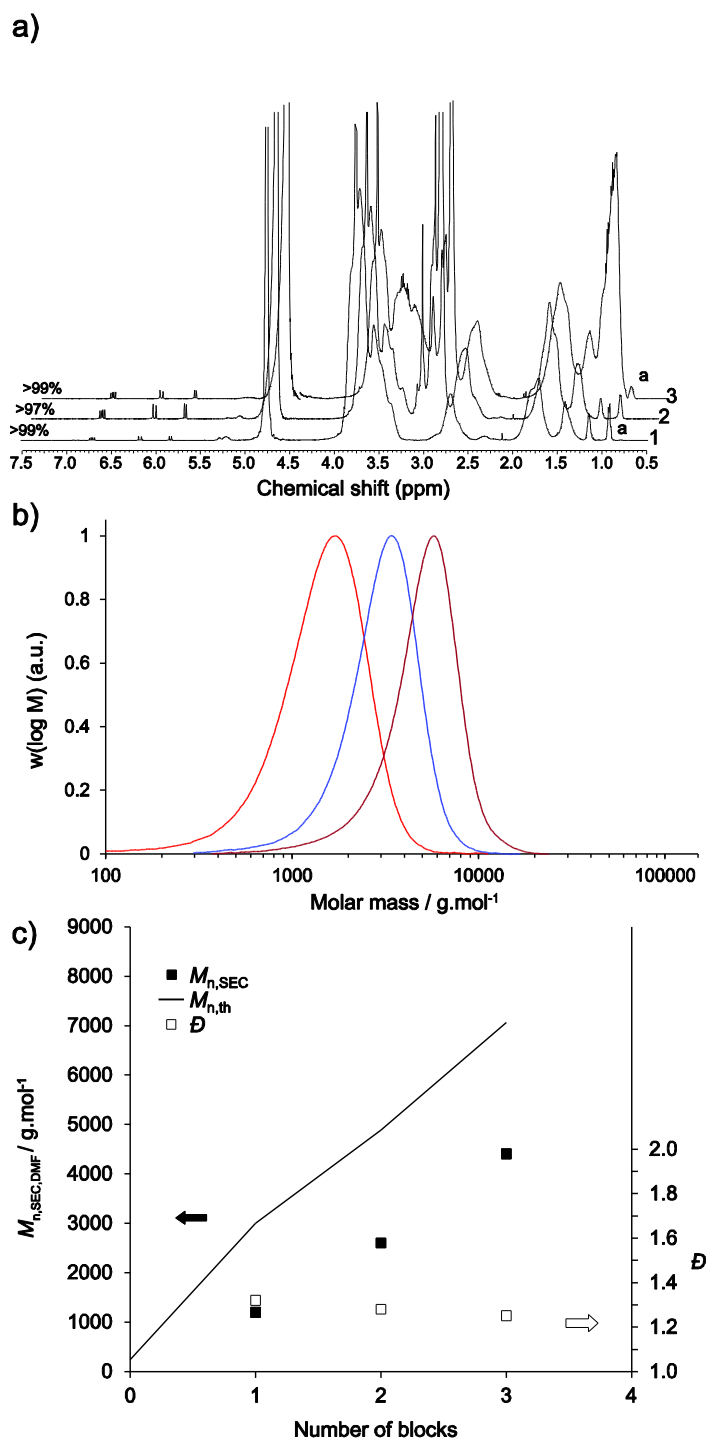

**Figure S19.** (a)  $^1\text{H}$  NMR spectra ( $\text{D}_2\text{O}$ , 300 MHz) showing the monomer conversion for each block after 3 min of iterative RAFT polymerization in the presence of air and without degassing; (b) MWDs for successive block extensions of the triblock  $\text{PNAM}_{20}\text{-}b\text{-PDMA}_{20}\text{-}b\text{-PDEA}_{20}$  (Scheme 4 and Table 2, multiblock I) at  $100^\circ\text{C}$  with VA-044 as initiator (3 min. per block) (see Table S12 for reaction conditions); (c) Evolution of the number-average molar mass and dispersity with the number of blocks during the preparation of the triblock copolymer. The black line represents the theoretical molar mass calculated from Equation 2. The filled squares represent the experimental molar masses obtained by DMF SEC. The empty squares represent the dispersity values as determined by DMF SEC.

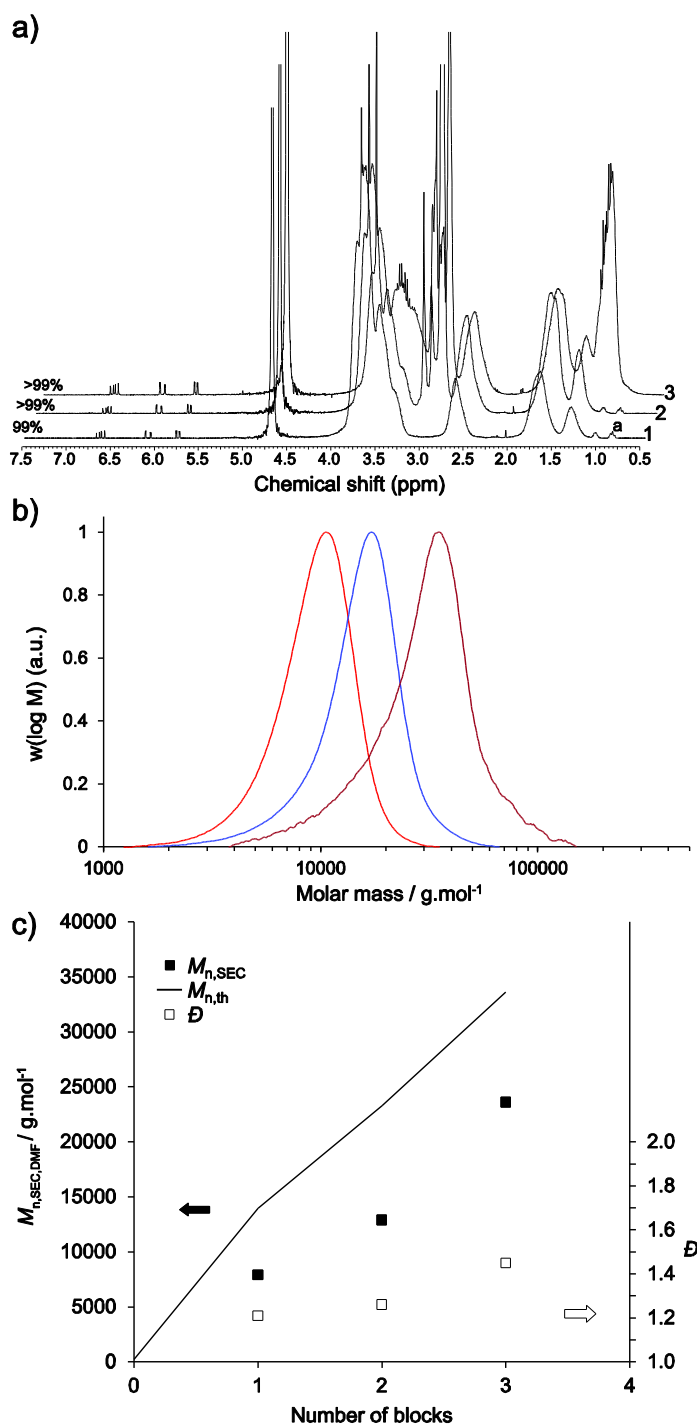

**Figure S20.** (a)  $^1\text{H}$  NMR spectra (D<sub>2</sub>O, 300 MHz) showing the monomer conversion for each block after 3 min of iterative RAFT polymerization in the presence of air and without degassing; (b) MWDs for successive block extensions of the triblock PNAM<sub>100</sub>-*b*-PDMA<sub>100</sub>-*b*-PDEA<sub>100</sub> (Scheme 4 and Table 2, multiblock **m**) at 100°C with VA-044 as initiator (3 min per block) (see Table S13 for reaction conditions); (c) Evolution of the number-average molar mass and dispersity with the number of blocks during the preparation of the triblock copolymer. The black line represents the theoretical molar mass calculated from Equation 2. The filled squares represent the experimental molar masses obtained by DMF SEC. The empty squares represent the dispersity values as determined by DMF SEC.



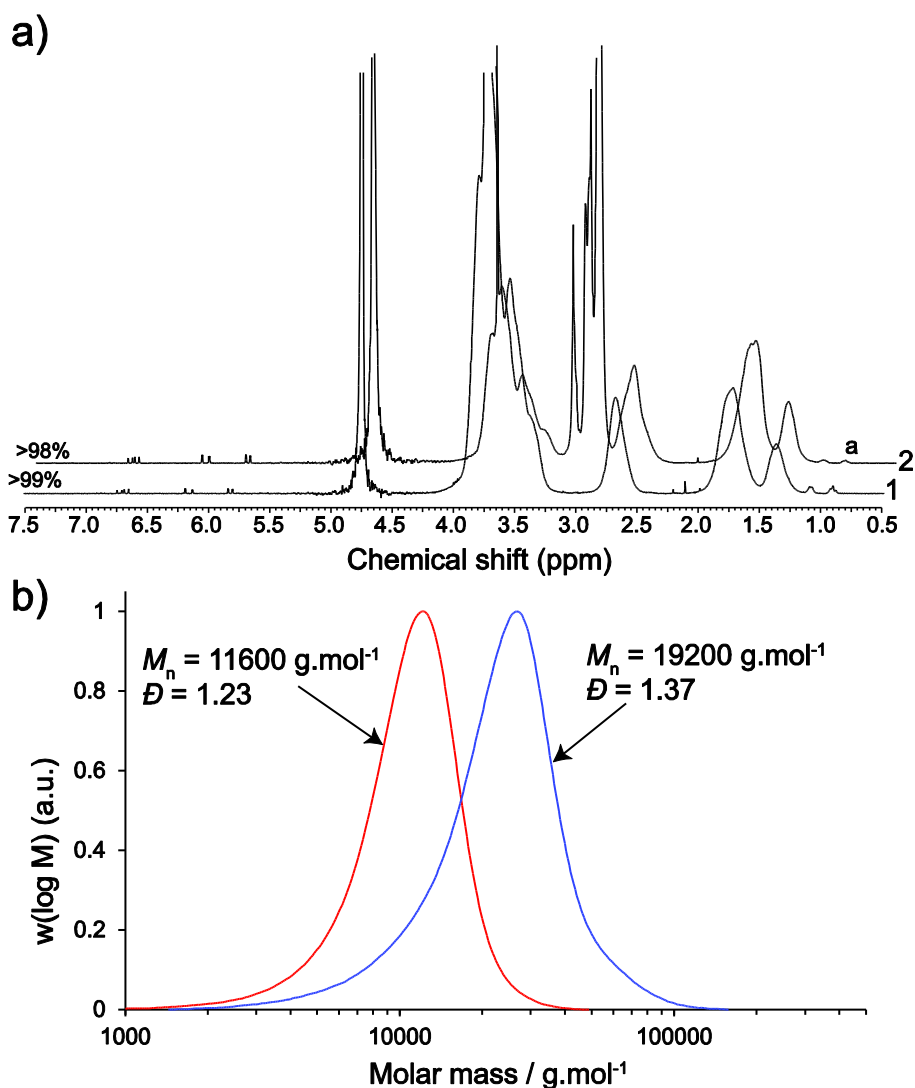

**Figure S21.** (a)  $^1\text{H}$  NMR spectra ( $\text{D}_2\text{O}$ , 300 MHz) showing the monomer conversion for each block after 3 min of iterative RAFT polymerization in the presence of air and without degassing; (b) SEC chromatograms for successive block extensions of the diblock  $\text{PNAM}_{150}\text{-}b\text{-PDMA}_{150}$  (Scheme 4 and Table 2, multiblock **n**) at  $100^\circ\text{C}$  with VA-044 as initiator (3 min per block) (see Table S14 for reaction conditions), as well as number-average molar masses and dispersity values for the different blocks as determined with the DMF SEC system.

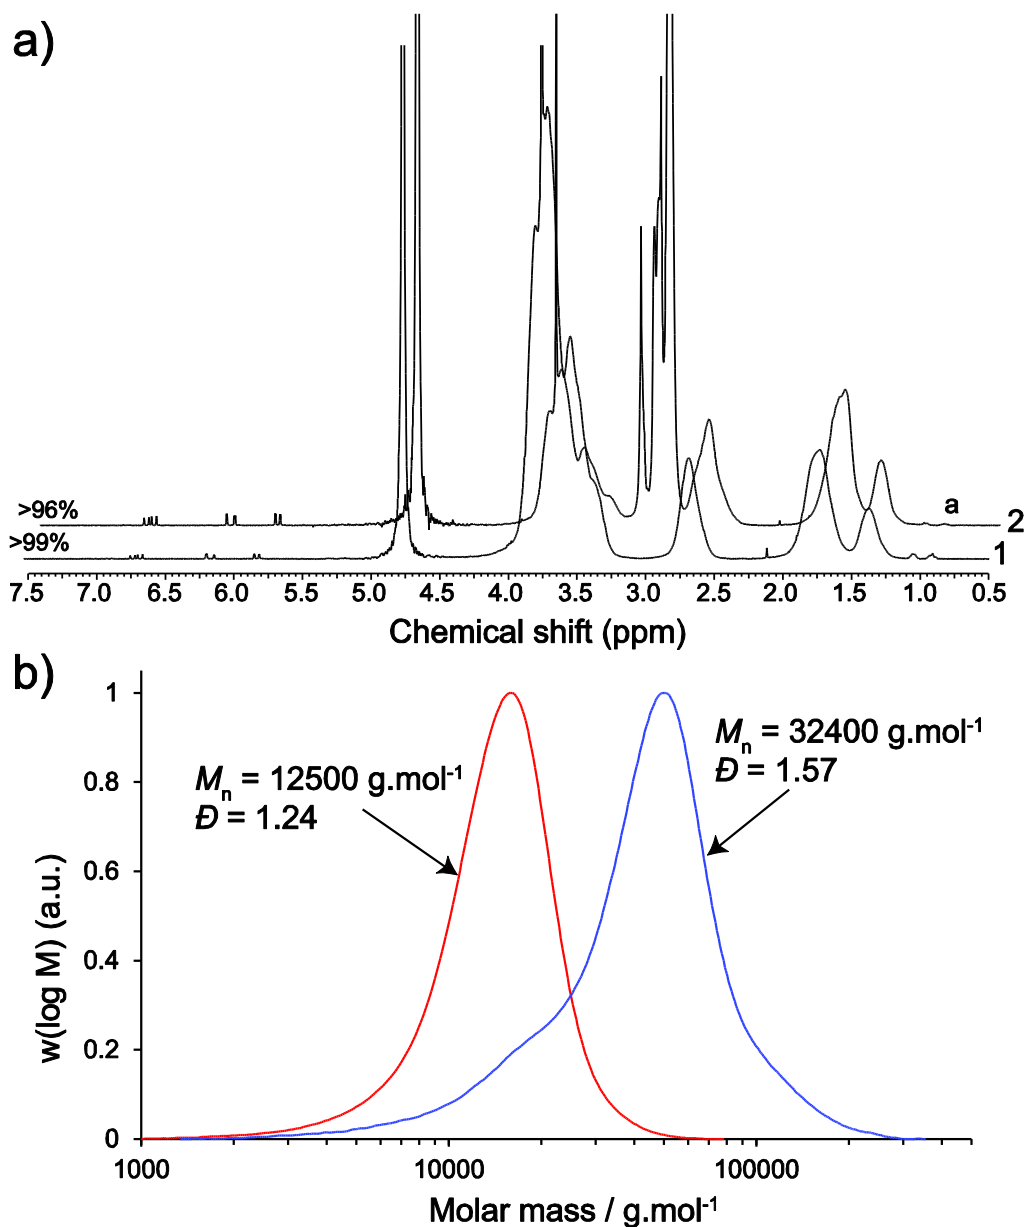

**Figure S22.** (a) <sup>1</sup>H NMR spectra (D<sub>2</sub>O, 300 MHz) showing the monomer conversion for each block after 3 min of iterative RAFT polymerization in the presence of air and without degassing; (b) SEC chromatograms for successive block extensions of the diblock copolymer PNAM<sub>200</sub>-*b*-PDMA<sub>200</sub> (Scheme 4 and Table 2, multiblock **o**) at 100°C with VA-044 as initiator (3 min per block) (see Table S15 for reaction conditions), as well as number-average molar masses and dispersity values for the different blocks as determined with the DMF SEC system.

**Table S1.** Experimental conditions for the preparation of the heptablock [PNAM<sub>10</sub>]<sub>7</sub> (Scheme 3, multiblock **a**) in H<sub>2</sub>O/dioxane at 100°C with VA-044 as initiator (3 min per block, in the presence of air, and without degassing).

| Cycles                                          | 1                    | 2                    | 3                    | 4                    | 5                    | 6                    | 7                    |
|-------------------------------------------------|----------------------|----------------------|----------------------|----------------------|----------------------|----------------------|----------------------|
| Monomer                                         | NAM                  |
| DP <sub>targeted</sub>                          | 10                   | 10                   | 10                   | 10                   | 10                   | 10                   | 10                   |
| m <sub>monomer added</sub> (mg)                 | 400                  | 400                  | 400                  | 400                  | 400                  | 400                  | 400                  |
| m <sub>CTA added</sub> (mg)                     | 67.6                 | -                    | -                    | -                    | -                    | -                    | -                    |
| m <sub>VA-044 added</sub> (mg)                  | 0.611                | 0.458                | 0.705                | 0.916                | 1.145                | 1.409                | 1.666                |
| m <sub>VA-044 initial</sub> <sup>[a]</sup> (mg) | 0.611                | 0.702                | 0.902                | 1.168                | 1.472                | 1.821                | 2.176                |
| V <sub>H<sub>2</sub>O added</sub> (mL)          | 0.264                | 0.352                | 0.352                | 0.352                | 0.352                | 0.352                | 0.352                |
| V <sub>dioxane added</sub> (mL)                 | 0.088                | -                    | -                    | -                    | -                    | -                    | -                    |
| % H <sub>2</sub> O                              | 75.0                 | 87.5                 | 91.7                 | 93.7                 | 95.0                 | 95.8                 | 96.4                 |
| V <sub>total</sub> <sup>[b]</sup> (mL)          | 0.709                | 1.417                | 2.125                | 2.834                | 3.542                | 4.250                | 4.959                |
| [VA-044] <sub>0</sub> (mol.L <sup>-1</sup> )    | 2.7 10 <sup>-3</sup> | 1.5 10 <sup>-3</sup> | 1.3 10 <sup>-3</sup> | 1.3 10 <sup>-3</sup> | 1.3 10 <sup>-3</sup> | 1.3 10 <sup>-3</sup> | 1.4 10 <sup>-3</sup> |
| [NAM] <sub>0</sub> (mol.L <sup>-1</sup> )       | 4.00                 | 2.00                 | 1.33                 | 1.00                 | 0.80                 | 0.67                 | 0.57                 |
| [CTA] <sub>0</sub> /[VA-044] <sub>0</sub>       | 150                  | 130                  | 102                  | 78                   | 62                   | 50                   | 42                   |
| L <sup>[c]</sup> (%)                            | 99.6                 | 99.5                 | 99.3                 | 99.1                 | 98.9                 | 98.6                 | 98.3                 |
| Cumulative L <sup>[d]</sup> (%)                 | 99.6                 | 99.1                 | 98.4                 | 97.5                 | 96.3                 | 95.0                 | 93.4                 |

[a] m<sub>VA-044 initial</sub> represents the sum of the initiator added m<sub>VA-044 added</sub> + the amount of initiator remaining from the previous block. [b] represents the sum of the volume of the solvent added + volume of the monomer added + V<sub>total</sub> previous block; [c] theoretical estimation of the fraction of living chains per block (e.g. extendable chains having the Z group); [d] theoretical estimation of the cumulated fraction of living chains

**Table S2.** Experimental conditions for the preparation of the hexablock [PNAM<sub>20</sub>]<sub>6</sub> (Scheme 3, multiblock **b**) in H<sub>2</sub>O/dioxane at 100°C with VA-044 as initiator (3 min per block, in the presence of air, and without degassing).

| Cycles                                          | 1                    | 2                    | 3                    | 4                    | 5                    | 6                    |
|-------------------------------------------------|----------------------|----------------------|----------------------|----------------------|----------------------|----------------------|
| Monomer                                         | NAM                  | NAM                  | NAM                  | NAM                  | NAM                  | NAM                  |
| DP <sub>targeted</sub>                          | 20                   | 20                   | 20                   | 20                   | 20                   | 20                   |
| <hr/>                                           |                      |                      |                      |                      |                      |                      |
| m <sub>monomer added</sub> (mg)                 | 400                  | 400                  | 400                  | 400                  | 400                  | 400                  |
| m <sub>CTA added</sub> (mg)                     | 33.8                 | -                    | -                    | -                    | -                    | -                    |
| m <sub>VA-044 added</sub> (mg)                  | 0.458                | 0.458                | 0.705                | 0.916                | 1.145                | 1.309                |
| m <sub>VA-044 initial</sub> <sup>[a]</sup> (mg) | 0.458                | 0.641                | 0.885                | 1.164                | 1.471                | 1.721                |
| V <sub>H2O added</sub> (mL)                     | 0.282                | 0.352                | 0.352                | 0.352                | 0.352                | 0.352                |
| V <sub>dioxane added</sub> (mL)                 | 0.070                | -                    | -                    | -                    | -                    | -                    |
| <hr/>                                           |                      |                      |                      |                      |                      |                      |
| % H <sub>2</sub> O                              | 80.1                 | 90.0                 | 93.4                 | 95.0                 | 96.0                 | 96.7                 |
| V <sub>total</sub> <sup>[b]</sup> (mL)          | 0.708                | 1.416                | 2.125                | 2.833                | 3.541                | 4.250                |
| [VA-044] <sub>0</sub> (mol.L <sup>-1</sup> )    | 2.0 10 <sup>-3</sup> | 1.4 10 <sup>-3</sup> | 1.3 10 <sup>-3</sup> | 1.3 10 <sup>-3</sup> | 1.3 10 <sup>-3</sup> | 1.2 10 <sup>-3</sup> |
| [NAM] <sub>0</sub> (mol.L <sup>-1</sup> )       | 4.00                 | 2.00                 | 1.33                 | 1.00                 | 0.80                 | 0.67                 |
| <hr/>                                           |                      |                      |                      |                      |                      |                      |
| [CTA] <sub>0</sub> /[VA-044] <sub>0</sub>       | 100                  | 71                   | 52                   | 39                   | 31                   | 27                   |
| L <sup>[c]</sup> (%)                            | 99.4                 | 99.0                 | 98.6                 | 98.2                 | 97.7                 | 97.4                 |
| Cumulative L <sup>[d]</sup> (%)                 | 99.4                 | 98.4                 | 97.1                 | 95.3                 | 93.2                 | 90.7                 |

[a] m<sub>VA-044 initial</sub> represents the sum of the initiator added m<sub>VA-044 added</sub> + the amount of initiator remaining from the previous block. [b] represents the sum of the volume of the solvent added + volume of the monomer added + V<sub>total</sub> previous block; [c] theoretical estimation of the fraction of living chains per block (e.g. extendable chains having the Z group); [d] theoretical estimation of the cumulated fraction of living chains

**Table S3.** Experimental conditions for the preparation of the pentablock [PNAM<sub>50</sub>]<sub>5</sub> (Scheme 3, multiblock **c**) in H<sub>2</sub>O/dioxane at 100°C with VA-044 as initiator (3 min per block, in the presence of air, and without degassing).

| Cycles                                                 | 1                    | 2                    | 3                    | 4                    | 5                    |
|--------------------------------------------------------|----------------------|----------------------|----------------------|----------------------|----------------------|
| Monomer                                                | NAM                  | NAM                  | NAM                  | NAM                  | NAM                  |
| DP <sub>targeted</sub>                                 | 50                   | 50                   | 50                   | 50                   | 50                   |
| m <sub>monomer added</sub> (mg)                        | 400                  | 400                  | 400                  | 400                  | 400                  |
| m <sub>C<sub>TA</sub> added</sub> (mg)                 | 13.5                 | -                    | -                    | -                    | -                    |
| m <sub>VA-044 added</sub> (mg)                         | 0.229                | 0.366                | 0.555                | 0.733                | 0.916                |
| m <sub>VA-044 initial</sub> <sup>[a]</sup> (mg)        | 0.229                | 0.458                | 0.683                | 0.924                | 1.175                |
| V <sub>H<sub>2</sub>O added</sub> (mL)                 | 0.317                | 0.352                | 0.352                | 0.352                | 0.352                |
| V <sub>dioxane added</sub> (mL)                        | 0.035                | -                    | -                    | -                    | -                    |
| % H <sub>2</sub> O                                     | 80.1                 | 90.0                 | 93.4                 | 95.0                 | 96.0                 |
| V <sub>total</sub> <sup>[b]</sup> (mL)                 | 0.708                | 1.417                | 2.125                | 2.833                | 3.542                |
| [VA-044] <sub>0</sub> (mol.L <sup>-1</sup> )           | 1.0 10 <sup>-3</sup> | 1.0 10 <sup>-3</sup> | 9.9 10 <sup>-4</sup> | 1.0 10 <sup>-3</sup> | 1.0 10 <sup>-3</sup> |
| [NAM] <sub>0</sub> (mol.L <sup>-1</sup> )              | 4.00                 | 2.00                 | 1.33                 | 1.00                 | 0.80                 |
| [C <sub>TA</sub> ] <sub>0</sub> /[VA-044] <sub>0</sub> | 80                   | 40                   | 27                   | 20                   | 16                   |
| L <sup>[c]</sup> (%)                                   | 99.3                 | 98.2                 | 97.4                 | 96.5                 | 95.6                 |
| Cumulative L <sup>[d]</sup> (%)                        | 99.3                 | 97.5                 | 95.0                 | 91.6                 | 87.6                 |

[a] m<sub>VA-044 initial</sub> represents the sum of the initiator added m<sub>VA-044 added</sub> + the amount of initiator remaining from the previous block. [b] represents the sum of the volume of the solvent added + volume of the monomer added + V<sub>total</sub> previous block; [c] theoretical estimation of the fraction of living chains per block (e.g. extendable chains having the Z group); [d] theoretical estimation of the cumulated fraction of living chains

**Table S4.** Experimental conditions for the preparation of the tetrablock [PNAM<sub>100</sub>]<sub>4</sub> (Scheme 3, multiblock **d**) in H<sub>2</sub>O/dioxane at 100°C with VA-044 as initiator (3 min per block, in the presence of air, and without degassing).

| Cycles                                          | 1                    | 2                    | 3                    | 4                    |
|-------------------------------------------------|----------------------|----------------------|----------------------|----------------------|
| Monomer                                         | NAM                  | NAM                  | NAM                  | NAM                  |
| DP <sub>targeted</sub>                          | 100                  | 100                  | 100                  | 100                  |
| m <sub>monomer added</sub> (mg)                 | 400                  | 400                  | 400                  | 400                  |
| m <sub>CTA added</sub> (mg)                     | 6.7                  | -                    | -                    | -                    |
| m <sub>VA-044 added</sub> (mg)                  | 0.183                | 0.395                | 0.458                | 0.611                |
| m <sub>VA-044 initial</sub> <sup>[a]</sup> (mg) | 0.183                | 0.468                | 0.589                | 0.776                |
| V <sub>H<sub>2</sub>O added</sub> (mL)          | 0.430                | 0.566                | 0.453                | 0.352                |
| V <sub>dioxane added</sub> (mL)                 | 0.023                | -                    | -                    | -                    |
| % H <sub>2</sub> O                              | 94.9                 | 97.7                 | 98.4                 | 98.7                 |
| V <sub>total</sub> <sup>[b]</sup> (mL)          | 0.810                | 1.733                | 2.542                | 3.352                |
| [VA-044] <sub>0</sub> (mol.L <sup>-1</sup> )    | 7.0 10 <sup>-4</sup> | 8.4 10 <sup>-4</sup> | 7.2 10 <sup>-4</sup> | 7.2 10 <sup>-4</sup> |
| [NAM] <sub>0</sub> (mol.L <sup>-1</sup> )       | 3.50                 | 1.64                 | 1.11                 | 0.85                 |
| [CTA] <sub>0</sub> /[VA-044] <sub>0</sub>       | 50                   | 20                   | 16                   | 12                   |
| L <sup>[c]</sup> (%)                            | 98.8                 | 96.5                 | 95.6                 | 94.3                 |
| Cumulative L <sup>[d]</sup> (%)                 | 98.8                 | 95.3                 | 91.1                 | 85.9                 |

[a] m<sub>VA-044 initial</sub> represents the sum of the initiator added m<sub>VA-044 added</sub> + the amount of initiator remaining from the previous block. [b] represents the sum of the volume of the solvent added + volume of the monomer added + V<sub>total</sub> previous block; [c] theoretical estimation of the fraction of living chains per block (e.g. extendable chains having the Z group); [d] theoretical estimation of the cumulated fraction of living chains

**Table S5.** Experimental conditions for the preparation of the triblock [PNAM<sub>200</sub>]<sub>3</sub> (Scheme 3, multiblock **e**) in H<sub>2</sub>O/dioxane at 100°C with VA-044 as initiator (3 min per block, in the presence of air, and without degassing).

| Cycles                                          | 1                    | 2                    | 3                    |
|-------------------------------------------------|----------------------|----------------------|----------------------|
| Monomer                                         | NAM                  | NAM                  | NAM                  |
| DP <sub>targeted</sub>                          | 200                  | 200                  | 200                  |
| <hr/>                                           |                      |                      |                      |
| m <sub>monomer added</sub> (mg)                 | 400                  | 400                  | 400                  |
| m <sub>CTA added</sub> (mg)                     | 3.4                  | -                    | -                    |
| m <sub>VA-044 added</sub> (mg)                  | 0.183                | 0.278                | 0.398                |
| m <sub>VA-044 initial</sub> <sup>[a]</sup> (mg) | 0.183                | 0.351                | 0.496                |
| V <sub>H2O added</sub> (mL)                     | 0.430                | 0.453                | 0.453                |
| V <sub>dioxane added</sub> (mL)                 | 0.023                | -                    | -                    |
| <hr/>                                           |                      |                      |                      |
| % H <sub>2</sub> O                              | 94.9                 | 97.5                 | 98.3                 |
| V <sub>total</sub> <sup>[b]</sup> (mL)          | 0.810                | 1.619                | 2.429                |
| [VA-044] <sub>0</sub> (mol.L <sup>-1</sup> )    | 7.0 10 <sup>-4</sup> | 6.7 10 <sup>-4</sup> | 6.3 10 <sup>-4</sup> |
| [NAM] <sub>0</sub> (mol.L <sup>-1</sup> )       | 3.50                 | 1.75                 | 1.17                 |
| <hr/>                                           |                      |                      |                      |
| [CTA] <sub>0</sub> /[VA-044] <sub>0</sub>       | 25                   | 13                   | 9                    |
| L <sup>[c]</sup> (%)                            | 97.7                 | 94.8                 | 92.8                 |
| Cumulative L <sup>[d]</sup> (%)                 | 97.7                 | 92.5                 | 85.8                 |

[a] m<sub>VA-044 initial</sub> represents the sum of the initiator added m<sub>VA-044 added</sub> + the amount of initiator remaining from the previous block. [b] represents the sum of the volume of the solvent added + volume of the monomer added + V<sub>total</sub> previous block; [c] theoretical estimation of the fraction of living chains per block (e.g. extendable chains having the Z group); [d] theoretical estimation of the cumulated fraction of living chains

**Table S6.** Experimental conditions for the preparation of PNAM<sub>400</sub> (Scheme 3, multiblock **f**) in H<sub>2</sub>O/dioxane at 100 °C with VA-044 as initiator (3 min polymerization, in the presence of air, and without degassing).

|                                            |                   |
|--------------------------------------------|-------------------|
| Cycles                                     | 1                 |
| Monomer                                    | NAM               |
| DP <sub>targeted</sub>                     | 400               |
| $m_{\text{monomer added}}$ (mg)            | 500               |
| $m_{\text{CTA added}}$ (mg)                | 2.1               |
| $m_{\text{VA-044 added}}$ (mg)             | 0.191             |
| $V_{\text{H}_2\text{O added}}$ (mL)        | 0.671             |
| $V_{\text{dioxane added}}$ (mL)            | 0.037             |
| % H <sub>2</sub> O                         | 95.0              |
| $V_{\text{total}}$ (mL)                    | 1.181             |
| $[\text{VA-044}]_0$ (mol.L <sup>-1</sup> ) | $5 \cdot 10^{-4}$ |
| $[\text{NAM}]_0$ (mol.L <sup>-1</sup> )    | 3                 |
| $[\text{CTA}]_0/[\text{VA-044}]_0$         | 15                |
| L <sup>[a]</sup> (%)                       | 95.5              |

[a] theoretical estimation of the fraction of living chains per block (e.g. extendable chains having the Z group).



**Table S7.** Experimental conditions for the preparation of PNAM<sub>600</sub> (Scheme 3, multiblock **g**) in H<sub>2</sub>O/dioxane at 100 °C with VA-044 as initiator (3 min polymerization, in the presence of air, and without degassing).

|                                              |                    |
|----------------------------------------------|--------------------|
| Cycles                                       | 1                  |
| Monomer                                      | NAM                |
| DP <sub>targeted</sub>                       | 600                |
| <hr/>                                        |                    |
| m <sub>monomer added</sub> (mg)              | 500                |
| m <sub>CTA added</sub> (mg)                  | 1.4                |
| m <sub>VA-044 added</sub> (mg)               | 0.191              |
| V <sub>H<sub>2</sub>O added</sub> (mL)       | 0.671              |
| V <sub>dioxane added</sub> (mL)              | 0.037              |
| <hr/>                                        |                    |
| % H <sub>2</sub> O                           | 95.0               |
| V <sub>total</sub> (mL)                      | 1.181              |
| [VA-044] <sub>0</sub> (mol.L <sup>-1</sup> ) | 5 10 <sup>-4</sup> |
| [NAM] <sub>0</sub> (mol.L <sup>-1</sup> )    | 3                  |
| <hr/>                                        |                    |
| [CTA] <sub>0</sub> /[VA-044] <sub>0</sub>    | 10                 |
| L <sup>[a]</sup> (%)                         | 93.5               |

[a] theoretical estimation of the fraction of living chains per block (e.g. extendable chains having the Z group).

**Table S8.** Experimental conditions for the preparation of the pentablock copolymer PNAM<sub>10</sub>-*b*-PDMA<sub>10</sub>-*b*-PNAM<sub>10</sub>-*b*-PHEAm<sub>10</sub>-*b*-PDEA<sub>10</sub> (Scheme 4, multiblock **h**) in H<sub>2</sub>O/dioxane at 100°C with VA-044 as initiator (3 min per block, in the presence of air, and without degassing).

| Cycles                                                 | 1                    | 2                    | 3                    | 4                    | 5                    |
|--------------------------------------------------------|----------------------|----------------------|----------------------|----------------------|----------------------|
| Monomer                                                | NAM                  | DMA                  | NAM                  | HEAm                 | DEA                  |
| DP <sub>targeted</sub>                                 | 10                   | 10                   | 10                   | 10                   | 10                   |
| <i>m</i> <sub>monomer added</sub> (mg)                 | 400                  | 281                  | 400                  | 326                  | 360                  |
| <i>m</i> <sub>CTA added</sub> (mg)                     | 67.6                 |                      |                      |                      |                      |
| <i>m</i> <sub>VA-044 added</sub> (mg)                  | 0.611                | 0.573                | 0.763                | 1.145                | 1.527                |
| <i>m</i> <sub>VA-044 initial</sub> <sup>[a]</sup> (mg) | 0.611                | 0.817                | 0.992                | 1.423                | 1.925                |
| V <sub>H<sub>2</sub>O</sub> (mL)                       | 0.264                | 0.220                | 0.317                | 0.273                | 0.319                |
| V <sub>dioxane added</sub> (mL)                        | 0.088                | 0.055                | 0.035                | 0.000                | 0.000                |
| % H <sub>2</sub> O                                     | 75.0                 | 84.6                 | 90.1                 | 92.4                 | 94.1                 |
| V <sub>total</sub> <sup>[b]</sup> (mL)                 | 0.708                | 1.275                | 1.983                | 2.550                | 3.258                |
| [VA-044] <sub>0</sub> (mol.L <sup>-1</sup> )           | 2.7 10 <sup>-3</sup> | 2.0 10 <sup>-3</sup> | 1.6 10 <sup>-3</sup> | 1.7 10 <sup>-3</sup> | 1.8 10 <sup>-3</sup> |
| [M] <sub>0</sub> (mol.L <sup>-1</sup> )                | 4.00                 | 2.22                 | 1.43                 | 1.11                 | 0.87                 |
| [CTA] <sub>0</sub> /[VA-044] <sub>0</sub>              | 150                  | 112                  | 92                   | 64                   | 48                   |
| L <sup>[c]</sup> (%)                                   | 99.6                 | 99.4                 | 99.2                 | 98.9                 | 98.5                 |
| Cumulative L <sup>[d]</sup> (%)                        | 99.6                 | 99.0                 | 98.2                 | 97.1                 | 95.7                 |

[a] *m*<sub>VA-044 initial</sub> represents the sum of the initiator added *m*<sub>VA-044 added</sub> + the amount of initiator remaining from the previous block. [b] represents the sum of the volume of the solvent added + volume of the monomer added + V<sub>total</sub> previous block; [c] theoretical estimation of the fraction of living chains per block (e.g. extendable chains having the Z group); [d] theoretical estimation of the cumulated fraction of living chains

**Table S9.** Experimental conditions for the preparation of the pentablock copolymer PNAM<sub>20</sub>-*b*-PDMA<sub>20</sub>-*b*-PNAM<sub>20</sub>-*b*-PHEAm<sub>20</sub>-*b*-PDEA<sub>20</sub> (Scheme 4, multiblock **i**) in H<sub>2</sub>O/dioxane at 100°C with VA-044 as initiator (3 min per block, in the presence of air, and without degassing).

| Cycles                                                 | 1                    | 2                    | 3                    | 4                    | 5                    |
|--------------------------------------------------------|----------------------|----------------------|----------------------|----------------------|----------------------|
| Monomer                                                | NAM                  | DMA                  | NAM                  | HEAm                 | DEA                  |
| DP <sub>targeted</sub>                                 | 20                   | 20                   | 20                   | 20                   | 20                   |
| <i>m</i> <sub>monomer added</sub> (mg)                 | 400                  | 281                  | 400                  | 326                  | 360                  |
| <i>m</i> <sub>CTA added</sub> (mg)                     | 33.8                 |                      |                      |                      |                      |
| <i>m</i> <sub>VA-044 added</sub> (mg)                  | 0.458                | 0.458                | 0.611                | 1.018                | 1.145                |
| <i>m</i> <sub>VA-044 initial</sub> <sup>[a]</sup> (mg) | 0.458                | 0.641                | 0.791                | 1.239                | 1.492                |
| V <sub>H<sub>2</sub>O</sub> (mL)                       | 0.264                | 0.220                | 0.317                | 0.273                | 0.319                |
| V <sub>dioxane added</sub> (mL)                        | 0.088                | 0.055                | 0.035                | 0.000                | 0.000                |
| % H <sub>2</sub> O                                     | 75.0                 | 84.6                 | 90.1                 | 92.4                 | 94.1                 |
| V <sub>total</sub> <sup>[b]</sup> (mL)                 | 0.708                | 1.275                | 1.983                | 2.550                | 3.258                |
| [VA-044] <sub>0</sub> (mol.L <sup>-1</sup> )           | 2.0 10 <sup>-3</sup> | 1.6 10 <sup>-3</sup> | 1.2 10 <sup>-3</sup> | 1.5 10 <sup>-3</sup> | 1.4 10 <sup>-3</sup> |
| [M] <sub>0</sub> (mol.L <sup>-1</sup> )                | 4.00                 | 2.22                 | 1.43                 | 1.11                 | 0.87                 |
| [CTA] <sub>0</sub> /[VA-044] <sub>0</sub>              | 100                  | 71                   | 58                   | 37                   | 31                   |
| L <sup>[c]</sup> (%)                                   | 99.4                 | 99.0                 | 98.8                 | 98.1                 | 97.7                 |
| Cumulative L <sup>[d]</sup> (%)                        | 99.4                 | 98.4                 | 97.2                 | 95.4                 | 93.2                 |

[a] *m*<sub>VA-044 initial</sub> represents the sum of the initiator added *m*<sub>VA-044 added</sub> + the amount of initiator remaining from the previous block. [b] represents the sum of the volume of the solvent added + volume of the monomer added + V<sub>total</sub> previous block; [c] theoretical estimation of the fraction of living chains per block (e.g. extendable chains having the Z group); [d] theoretical estimation of the cumulated fraction of living chains

**Table S10.** Experimental conditions for the preparation of the tetrablock copolymer PNAM<sub>50</sub>-*b*-PDMA<sub>50</sub>-*b*-PHEAm<sub>50</sub>-*b*-PDEA<sub>50</sub> (Scheme 4, multiblock **j**) in H<sub>2</sub>O/dioxane at 100°C with VA-044 as initiator (3 min per block, in the presence of air, and without degassing).

| Cycles                                          | 1                    | 2                    | 3                    | 4                    |
|-------------------------------------------------|----------------------|----------------------|----------------------|----------------------|
| Monomer                                         | NAM                  | DMA                  | HEAm                 | DEA                  |
| DP <sub>targeted</sub>                          | 50                   | 50                   | 50                   | 50                   |
| m <sub>monomer added</sub> (mg)                 | 400                  | 281                  | 326                  | 360                  |
| m <sub>CTA added</sub> (mg)                     | 13.5                 |                      |                      |                      |
| m <sub>VA-044 added</sub> (mg)                  | 0.229                | 0.366                | 0.611                | 0.833                |
| m <sub>VA-044 initial</sub> <sup>[a]</sup> (mg) | 0.229                | 0.458                | 0.739                | 1.040                |
| V <sub>H<sub>2</sub>O</sub> (mL)                | 0.362                | 0.179                | 0.218                | 0.319                |
| V <sub>dioxane added</sub> (mL)                 | 0.091                | 0.045                | 0.055                | 0.000                |
| % H <sub>2</sub> O                              | 79.9                 | 85.6                 | 89.3                 | 92.2                 |
| V <sub>total</sub> <sup>[b]</sup> (mL)          | 0.810                | 1.325                | 1.893                | 2.601                |
| [VA-044] <sub>0</sub> (mol.L <sup>-1</sup> )    | 8.8 10 <sup>-4</sup> | 1.1 10 <sup>-3</sup> | 1.2 10 <sup>-3</sup> | 1.2 10 <sup>-3</sup> |
| [M] <sub>0</sub> (mol.L <sup>-1</sup> )         | 3.50                 | 2.14                 | 1.50                 | 1.09                 |
| [CTA] <sub>0</sub> /[VA-044] <sub>0</sub>       | 80                   | 40                   | 25                   | 18                   |
| L <sup>[c]</sup> (%)                            | 99.3                 | 98.2                 | 97.2                 | 96.1                 |
| Cumulative L <sup>[d]</sup> (%)                 | 99.3                 | 97.5                 | 94.8                 | 91.0                 |

[a] m<sub>VA-044 initial</sub> represents the sum of the initiator added m<sub>VA-044 added</sub> + the amount of initiator remaining from the previous block. [b] represents the sum of the volume of the solvent added + volume of the monomer added + V<sub>total</sub> previous block; [c] theoretical estimation of the fraction of living chains per block (e.g. extendable chains having the Z group); [d] theoretical estimation of the cumulated fraction of living chains

**Table S11.** Experimental conditions for the preparation of the triblock copolymer PNAM<sub>20</sub>-*b*-PDMA<sub>20</sub>-*b*-PDEA<sub>20</sub> (Scheme 4, multiblock **k**) in H<sub>2</sub>O/dioxane at 100°C with VA-044 as initiator (3 min per block, in the presence of air, and without degassing).

| Cycles                                                 | 1                    | 2                    | 3                    |
|--------------------------------------------------------|----------------------|----------------------|----------------------|
| Monomer                                                | NAM                  | DMA                  | DEA                  |
| DP <sub>targeted</sub>                                 | 20                   | 20                   | 20                   |
| <i>m</i> <sub>monomer added</sub> (mg)                 | 500                  | 351                  | 450                  |
| <i>m</i> <sub>CTA added</sub> (mg)                     | 42.2                 |                      |                      |
| <i>m</i> <sub>VA-044 added</sub> (mg)                  | 0.716                | 0.573                | 0.881                |
| <i>m</i> <sub>VA-044 initial</sub> <sup>[a]</sup> (mg) | 0.716                | 0.859                | 1.122                |
| V <sub>H<sub>2</sub>O</sub> (mL)                       | 0.425                | 0.225                | 0.376                |
| V <sub>dioxane added</sub> (mL)                        | 0.142                | 0                    | 0                    |
| % H <sub>2</sub> O                                     | 74.9                 | 82.1                 | 87.8                 |
| V <sub>total</sub> <sup>[b]</sup> (mL)                 | 1.012                | 1.603                | 2.466                |
| [VA-044] <sub>0</sub> (mol.L <sup>-1</sup> )           | 2.2 10 <sup>-3</sup> | 1.7 10 <sup>-3</sup> | 1.4 10 <sup>-3</sup> |
| [M] <sub>0</sub> (mol.L <sup>-1</sup> )                | 3.50                 | 2.21                 | 1.44                 |
| [CTA] <sub>0</sub> /[VA-044] <sub>0</sub>              | 80                   | 67                   | 51                   |
| L <sup>[c]</sup> (%)                                   | 99.3                 | 98.9                 | 98.6                 |
| Cumulative L <sup>[d]</sup> (%)                        | 99.3                 | 98.2                 | 96.8                 |

[a] *m*<sub>VA-044 initial</sub> represents the sum of the initiator added *m*<sub>VA-044 added</sub> + the amount of initiator remaining from the previous block. [b] represents the sum of the volume of the solvent added + volume of the monomer added + V<sub>total</sub> previous block; [c] theoretical estimation of the fraction of living chains per block (e.g. extendable chains having the Z group); [d] theoretical estimation of the cumulated fraction of living chains

**Table S12.** Experimental conditions for the preparation of the triblock copolymer PNAM<sub>20</sub>-*b*-PDMA<sub>20</sub>-*b*-PHEAm<sub>20</sub> (Scheme 4, multiblock I) in H<sub>2</sub>O/dioxane at 100°C with VA-044 as initiator (3 min per block, in the presence of air, and without degassing).

| Cycles                                                 | 1                    | 2                    | 3                    |
|--------------------------------------------------------|----------------------|----------------------|----------------------|
| Monomer                                                | NAM                  | DMA                  | HEAm                 |
| DP <sub>targeted</sub>                                 | 20                   | 20                   | 20                   |
| <i>m</i> <sub>monomer added</sub> (mg)                 | 500                  | 351                  | 408                  |
| <i>m</i> <sub>CTA added</sub> (mg)                     | 42.2                 |                      |                      |
| <i>m</i> <sub>VA-044 added</sub> (mg)                  | 0.716                | 0.498                | 0.881                |
| <i>m</i> <sub>VA-044 initial</sub> <sup>[a]</sup> (mg) | 0.716                | 0.784                | 1.101                |
| V <sub>H<sub>2</sub>O</sub> (mL)                       | 0.425                | 0.334                | 0.814                |
| V <sub>dioxane added</sub> (mL)                        | 0.142                | 0                    | 0                    |
| % H <sub>2</sub> O                                     | 74.9                 | 84.4                 | 91.8                 |
| V <sub>total</sub> <sup>[b]</sup> (mL)                 | 1.012                | 1.721                | 2.902                |
| [VA-044] <sub>0</sub> (mol.L <sup>-1</sup> )           | 2.2 10 <sup>-3</sup> | 1.4 10 <sup>-3</sup> | 1.2 10 <sup>-3</sup> |
| [M] <sub>0</sub> (mol.L <sup>-1</sup> )                | 3.50                 | 2.06                 | 1.22                 |
| [CTA] <sub>0</sub> /[VA-044] <sub>0</sub>              | 80                   | 73                   | 52                   |
| L <sup>[c]</sup> (%)                                   | 99.3                 | 99.0                 | 98.6                 |
| Cumulative L <sup>[d]</sup> (%)                        | 99.3                 | 98.3                 | 96.9                 |

[a] *m*<sub>VA-044 initial</sub> represents the sum of the initiator added *m*<sub>VA-044 added</sub> + the amount of initiator remaining from the previous block. [b] represents the sum of the volume of the solvent added + volume of the monomer added + V<sub>total</sub> previous block; [c] theoretical estimation of the fraction of living chains per block (e.g. extendable chains having the Z group); [d] theoretical estimation of the cumulated fraction of living chains

**Table S13.** Experimental conditions for the preparation of the triblock copolymer PNAM<sub>100</sub>-*b*-PDMA<sub>100</sub>-*b*-PDEA<sub>100</sub> (Scheme 4, multiblock **m**) in H<sub>2</sub>O/dioxane at 100°C with VA-044 as initiator (3 min per block, in the presence of air, and without degassing).

| Cycles                                                 | 1                    | 2                    | 3                    |
|--------------------------------------------------------|----------------------|----------------------|----------------------|
| Monomer                                                | NAM                  | DMA                  | DEA                  |
| DP <sub>targeted</sub>                                 | 100                  | 100                  | 100                  |
| <i>m</i> <sub>monomer added</sub> (mg)                 | 500                  | 351                  | 450                  |
| <i>m</i> <sub>CTA added</sub> (mg)                     | 8.4                  |                      |                      |
| <i>m</i> <sub>VA-044 added</sub> (mg)                  | 0.229                | 0.382                | 0.674                |
| <i>m</i> <sub>VA-044 initial</sub> <sup>[a]</sup> (mg) | 0.229                | 0.474                | 0.807                |
| V <sub>H<sub>2</sub>O</sub> (mL)                       | 0.538                | 0.225                | 0.221                |
| V <sub>dioxane added</sub> (mL)                        | 0.028                | 0                    | 0                    |
| % H <sub>2</sub> O                                     | 95.1                 | 96.5                 | 97.2                 |
| V <sub>total</sub> <sup>[b]</sup> (mL)                 | 1.012                | 1.602                | 2.310                |
| [VA-044] <sub>0</sub> (mol.L <sup>-1</sup> )           | 7.0 10 <sup>-4</sup> | 9.1 10 <sup>-4</sup> | 1.1 10 <sup>-3</sup> |
| [M] <sub>0</sub> (mol.L <sup>-1</sup> )                | 3.50                 | 2.21                 | 1.53                 |
| [CTA] <sub>0</sub> /[VA-044] <sub>0</sub>              | 50                   | 24                   | 14                   |
| L <sup>[c]</sup> (%)                                   | 98.8                 | 97.1                 | 95.2                 |
| Cumulative L <sup>[d]</sup> (%)                        | 98.8                 | 96.0                 | 91.3                 |

[a] *m*<sub>VA-044 initial</sub> represents the sum of the initiator added *m*<sub>VA-044 added</sub> + the amount of initiator remaining from the previous block. [b] represents the sum of the volume of the solvent added + volume of the monomer added + V<sub>total</sub> previous block; [c] theoretical estimation of the fraction of living chains per block (e.g. extendable chains having the Z group); [d] theoretical estimation of the cumulated fraction of living chains

**Table S14.** Experimental conditions for the preparation of the diblock copolymer PNAM<sub>150</sub>-*b*-PDMA<sub>150</sub> (Scheme 4, multiblock **n**) in H<sub>2</sub>O/dioxane at 100°C with VA-044 as initiator (3 min per block, in the presence of air, and without degassing).

| Cycles                                          | 1                    | 2                    |
|-------------------------------------------------|----------------------|----------------------|
| Monomer                                         | NAM                  | DMA                  |
| DP <sub>targeted</sub>                          | 150                  | 150                  |
| <hr/>                                           |                      |                      |
| m <sub>monomer added</sub> (mg)                 | 500                  | 527                  |
| m <sub>CTA added</sub> (mg)                     | 5.6                  |                      |
| m <sub>VA-044 added</sub> (mg)                  | 0.231                | 0.491                |
| m <sub>VA-044 initial</sub> <sup>[a]</sup> (mg) | 0.231                | 0.583                |
| V <sub>H<sub>2</sub>O</sub> (mL)                | 0.510                | 0.781                |
| V <sub>dioxane added</sub> (mL)                 | 0.057                | 0                    |
| <hr/>                                           |                      |                      |
| % H <sub>2</sub> O                              | 89.9                 | 95.8                 |
| V <sub>total</sub> <sup>[b]</sup> (mL)          | 1.012                | 2.341                |
| [VA-044] <sub>0</sub> (mol.L <sup>-1</sup> )    | 7.1 10 <sup>-4</sup> | 7.7 10 <sup>-4</sup> |
| [M] <sub>0</sub> (mol.L <sup>-1</sup> )         | 3.50                 | 2.27                 |
| <hr/>                                           |                      |                      |
| [CTA] <sub>0</sub> /[VA-044] <sub>0</sub>       | 33                   | 13                   |
| L <sup>[c]</sup> (%)                            | 98.2                 | 94.8                 |
| Cumulative L <sup>[d]</sup> (%)                 | 98.2                 | 93.1                 |

[a] m<sub>VA-044 initial</sub> represents the sum of the initiator added m<sub>VA-044 added</sub> + the amount of initiator remaining from the previous block. [b] represents the sum of the volume of the solvent added + volume of the monomer added + V<sub>total</sub> previous block; [c] theoretical estimation of the fraction of living chains per block (e.g. extendable chains having the Z group); [d] theoretical estimation of the cumulated fraction of living chains



**Table S15.** Experimental conditions for the preparation of the diblock copolymer PNAM<sub>200</sub>-*b*-PDMA<sub>200</sub> (Scheme 4, multiblock **o**) in H<sub>2</sub>O/dioxane at 100°C with VA-044 as initiator (3 min per block, in the presence of air, and without degassing).

| Cycles                                          | 1                    | 2                    |
|-------------------------------------------------|----------------------|----------------------|
| Monomer                                         | NAM                  | DMA                  |
| DP <sub>targeted</sub>                          | 200                  | 200                  |
| <hr/>                                           |                      |                      |
| m <sub>monomer added</sub> (mg)                 | 500                  | 702                  |
| m <sub>CTA added</sub> (mg)                     | 4.2                  |                      |
| m <sub>VA-044 added</sub> (mg)                  | 0.229                | 0.636                |
| m <sub>VA-044 initial</sub> <sup>[a]</sup> (mg) | 0.229                | 0.728                |
| V <sub>H<sub>2</sub>O</sub> (mL)                | 0.510                | 1.041                |
| V <sub>dioxane added</sub> (mL)                 | 0.057                | 0                    |
| <hr/>                                           |                      |                      |
| % H <sub>2</sub> O                              | 89.9                 | 96.5                 |
| V <sub>total</sub> <sup>[b]</sup> (mL)          | 1.012                | 2.783                |
| [VA-044] <sub>0</sub> (mol.L <sup>-1</sup> )    | 7.0 10 <sup>-4</sup> | 8.1 10 <sup>-4</sup> |
| [M] <sub>0</sub> (mol.L <sup>-1</sup> )         | 3.50                 | 2.55                 |
| <hr/>                                           |                      |                      |
| [CTA] <sub>0</sub> /[VA-044] <sub>0</sub>       | 25                   | 8                    |
| L <sup>[c]</sup> (%)                            | 96.2                 | 88.7                 |
| Cumulative L <sup>[d]</sup> (%)                 | 96.2                 | 85.3                 |

[a] m<sub>VA-044 initial</sub> represents the sum of the initiator added m<sub>VA-044 added</sub> + the amount of initiator remaining from the previous block. [b] represents the sum of the volume of the solvent added + volume of the monomer added + V<sub>total</sub> previous block; [c] theoretical estimation of the fraction of living chains per block (e.g. extendable chains having the Z group); [d] theoretical estimation of the cumulated fraction of living chains
